# Supplementary material for: Association of the Patient Protection and Affordable Care Act With Ambulatory Quality, Patient Experience, Utilization, and Cost, 2014-2016
Source: PubMed Central journal article supplement (PMC9206183; doi:10.1001/jamanetworkopen.2022.18167), 2022-06-17

## Supplemental Online Content

Levine DM, Chalasani R, Linder JA, Landon BE. Association of the Patient Protection and Affordable Care Act with ambulatory quality, patient experience, utilization, and cost, 2014-2016. *JAMA Netw Open*. 2022;5(6):e2218167. doi:10.1001/jamanetworkopen.2022.18167

**eTable 1.** Clinical and Patient Experience Quality Measures

**eTable 2.** Outpatient Quality, Experience, Utilization, and Cost Before (2011-2013) the Affordable Care Act

**eTable 3.** Outpatient Quality, Experience, Utilization, and Cost Before (2011-2013) and After (2016) the Affordable Care Act

**eTable 4.** Expanded Measures of Outpatient Quality, Experience, Utilization, and Cost Before (2011-2013) and After (2016) the Affordable Care Act

**eTable 5.** Expanded Measures of Outpatient Quality, Experience, Utilization, and Cost Before (2011-2013) and After (2014-2016) the Affordable Care Act

**eFigure 1.** High-Value Care Composites, 2011-2016

**eFigure 2.** Low-Value Care Composites, 2011-2016

**eFigure 3.** Experience Composites, 2011-2016

**eFigure 4.** Utilization, 2011-2016

**eFigure 5.** Utilization—Preventive Visit and Primary Care, 2011-2016

**eFigure 6.** Total Costs, 2011-2016

**eFigure 7.** Out-of-Pocket Costs, 2011-2016

This supplemental material has been provided by the authors to give readers additional information about their work.

**eTable 1.** Clinical and Patient Experience Quality Measures

| Measure                                                       | MEPS Data Source <sup>a</sup> | Reference <sup>b</sup> | Numerator                                                                                                            | Denominator <sup>c</sup>          |
|---------------------------------------------------------------|-------------------------------|------------------------|----------------------------------------------------------------------------------------------------------------------|-----------------------------------|
| <b>Underuse Clinical Care</b>                                 |                               |                        |                                                                                                                      |                                   |
| <b>Recommended Cancer Screening</b>                           |                               |                        |                                                                                                                      |                                   |
| Cervical cancer screening                                     | SR                            | 33                     | Papanicolaou smear within past 3 years                                                                               | Women, age 21-65, no hysterectomy |
| Breast cancer screening                                       | SR                            | 34                     | Mammogram within past 2 years                                                                                        | Women, age 50-74                  |
| Colorectal cancer screening                                   | SR                            | 35                     | Colonoscopy within past 10 years, sigmoidoscopy within past 5 years, or hemoccult test within past year <sup>d</sup> | Age 50-75                         |
| <b>Recommended Diagnostic and Preventive Testing</b>          |                               |                        |                                                                                                                      |                                   |
| Dental care                                                   | SR                            | 36                     | Dental visit within 1 year                                                                                           | All                               |
| Blood pressure measurement                                    | SR                            | 37                     | Blood pressure measurement within 2 years                                                                            | All                               |
| Cholesterol measurement                                       | SR                            | 38                     | Cholesterol measurement within any interval                                                                          | Age >= 35                         |
| Influenza vaccine                                             | SR                            | 39                     | Influenza vaccine within 1 year                                                                                      | Age >= 50                         |
| <b>Recommended Diabetes Care</b>                              |                               |                        |                                                                                                                      |                                   |
| A1c measurement                                               | DCS                           | 40                     | A1c measurement at least twice yearly                                                                                | All with diabetes                 |
| Foot exam                                                     | DCS                           | 40                     | Foot exam within 1 year                                                                                              | All with diabetes                 |
| Eye exam                                                      | DCS                           | 40                     | Retinal exam within 1 year                                                                                           | All with diabetes                 |
| <b>Recommended Counseling</b>                                 |                               |                        |                                                                                                                      |                                   |
| Weight loss counseling                                        | SR                            | 41                     | Within 1 year                                                                                                        | All overweight/obese              |
| Exercise counseling                                           | SR                            | 41                     | Within 1 year                                                                                                        | All overweight/obese              |
| Smoking cessation counseling                                  | SR                            | 42                     | Within 1 year                                                                                                        | All smokers                       |
| <b>Recommended Medical Treatment</b>                          |                               |                        |                                                                                                                      |                                   |
| Anticoagulation for atrial fibrillation                       | SR, C, P                      | 43                     | Anticoagulant prescription                                                                                           | Atrial fibrillation               |
| ACEi/ARB for heart failure                                    | SR, C, P                      | 44                     | ACEi/ARB prescription                                                                                                | Heart failure                     |
| Beta blocker for heart failure                                | SR, C, P                      | 44                     | Beta blocker prescription                                                                                            | Heart failure                     |
| Salicylates and/or platelet aggregation inhibitors for CAD/MI | SR, C, P                      | 45                     | Salicylates and/or platelet aggregation inhibitor prescription                                                       | CAD/MI                            |
| Beta blocker for CAD/MI                                       | SR, C, P                      | 45                     | Beta blocker prescription                                                                                            | CAD/MI                            |
| Statin for CAD/MI                                             | SR, C, P                      | 45                     | Statin prescription                                                                                                  | CAD/MI                            |
| Statin for dyslipidemia                                       | SR, C, P                      |                        | Statin prescription                                                                                                  | Dyslipidemia                      |

| Measure                                                      | MEPS Data Source <sup>a</sup> | Reference <sup>b</sup> | Numerator                                   | Denominator <sup>c</sup>                       |
|--------------------------------------------------------------|-------------------------------|------------------------|---------------------------------------------|------------------------------------------------|
| ACEi/ARB for diabetes & hypertension                         | SR, C, P                      | 40                     | ACEi/ARB prescription                       | Diabetes + hypertension                        |
| Statin for CVA                                               | SR, C, P                      | 46                     | Statin prescription                         | CVA                                            |
| Antiplatelet for CVA                                         | SR, C, P                      | 46                     | Anti-platelet prescription                  | CVA                                            |
| Controller medication for poorly controlled asthma           | SR, C, P                      | 47                     | ICS or ICS+LABA                             | Asthma + systemic steroid in past year         |
| Controller medication for poorly controlled COPD             | SR, C, P                      | 48                     | ICS+LABA or LAMA+LABA or ICS+LAMA+LABA      | COPD + systemic steroid in past year           |
| <b>Inappropriate Clinical Care</b>                           |                               |                        |                                             |                                                |
| <b>Inappropriate Antibiotic Use Avoidance</b>                |                               |                        |                                             |                                                |
| Antibiotics for acute bronchitis                             | SR, C, P                      | 17,50,51               | Antibiotic prescription during visit        | Acute bronchitis visit                         |
| Antibiotics for acute URI                                    | SR, C, P                      | 50,51                  | Antibiotic prescription during visit        | Acute URI visit                                |
| Antibiotics for influenza                                    | SR, C, P                      | 50                     | Antibiotic prescription during visit        | Influenza visit                                |
| <b>Inappropriate Medical Treatment Avoidance</b>             |                               |                        |                                             |                                                |
| Benzodiazepine for depression                                | SR, P                         | 53                     | Benzodiazepine prescription                 | Depression                                     |
| Opioid for headache                                          | SR, C, P                      | 54                     | Opioid prescription during visit            | Headache visit                                 |
| Opioid for back pain                                         | SR, C, P                      | 55                     | Opioid prescription during visit            | Back pain visit                                |
| NSAID use for hypertension, heart failure, or kidney disease | SR, C, P                      | 56                     | NSAID prescription                          | Hypertension, heart failure, or kidney disease |
| <b>Inappropriate Imaging Avoidance</b>                       |                               |                        |                                             |                                                |
| MRI/CT for back pain                                         | C                             | 57                     | MRI/CT within 1 month of visit <sup>e</sup> | Back pain visit                                |
| X-ray for back pain                                          | C                             | 57                     | X-ray within 1 month of visit               | Back pain visit                                |
| MRI/CT for headache                                          | C                             | 58                     | MRI/CT during visit                         | Headache visit                                 |
| <b>Patient Experience</b>                                    |                               |                        |                                             |                                                |
| <b>Global Rating of Health Care</b>                          |                               |                        |                                             |                                                |
| Global rating of health care (0="worst" to 10="best")        | SAQ                           | CAHPS                  | Top-coded 8, 9, or 10 <sup>f</sup>          | All                                            |
| <b>Doctor Communication</b>                                  |                               |                        |                                             |                                                |
| Doctor listened to you (1="never" to 4="always")             | SAQ                           | CAHPS                  | Top-coded 4 <sup>e</sup>                    | All                                            |
| Doctor explained so you understood (1-4)                     | SAQ                           | CAHPS                  | Top-coded 4 <sup>e</sup>                    | All                                            |
| Doctor showed respect (1-4)                                  | SAQ                           | CAHPS                  | Top-coded 4 <sup>e</sup>                    | All                                            |

| Measure                                              | MEPS Data Source <sup>a</sup> | Reference <sup>b</sup> | Numerator                | Denominator <sup>c</sup> |
|------------------------------------------------------|-------------------------------|------------------------|--------------------------|--------------------------|
| Doctor spent enough time with you (1-4)              | SAQ                           | CAHPS                  | Top-coded 4 <sup>e</sup> | All                      |
| <b>Access to Care</b>                                |                               |                        |                          |                          |
| Got care when ill or injured as soon as wanted (1-4) | SAQ                           | CAHPS                  | Top-coded 4 <sup>e</sup> | All                      |
| Got medical appointment as soon as wanted (1-4)      | SAQ                           | CAHPS                  | Top-coded 4 <sup>e</sup> | All                      |

<sup>a</sup> MEPS combines multiple data sources (see **Methods** for details): C = clinician; DCS = diabetes care survey; P = pharmacy; SAQ = self-administered questionnaire; SR = self-report of household. Please note that the DCS and SAQ are self-report surveys.

<sup>b</sup> Where possible, these references refer to a detailed discussion of the clinical area that supports each measure. The National Quality Forum and other organizations have adopted these discussions to a measure definition with numerators and denominators (eAppendix for further details). Also, because clinical recommendations change over time, we used consistent measure definitions to ensure valid comparison (see **Methods** for details).

<sup>c</sup> See **eAppendix** for details and sensitivity analyses regarding identification of visit types.

<sup>d</sup> From 2009-2013, we were able to extract the numerator as given. From 2002-2008, we were not able to distinguish between colonoscopy and sigmoidoscopy, nor between a 5-year or 10-year screening interval, nor between screening vs diagnostic procedure. The change in phrasing of this question likely follows the change in recommendations.<sup>59</sup>

<sup>e</sup> Most measures recommend a 6 week delay, but the MEPS only consistently separates visits by month.

<sup>f</sup> “Top-coded” indicates that a response was dichotomized as follows: response of 4 on a 1-4 Likert scale or responses of 8, 9, or 10 on a 0-10 Likert scale were counted as positive. For comparison, we present linear measures rescaled 0 to 10 in the supplement (**eFigure 1**).

**Abbreviations:** A1c, hemoglobin A1c; ACEi, angiotensin converting enzyme inhibitor; ARB, angiotensin receptor blocker; CAD/MI, coronary artery disease / myocardial infarction; CAHPS, Consumer Assessment of Healthcare Providers and Systems; COPD, chronic obstructive pulmonary disease; CT, computed tomography; CVA, cerebral vascular accident; ICS, inhaled corticosteroid; LABA, long-acting beta agonist; LAMA, long-acting muscarinic antagonist; MRI, magnetic resonance imaging; NSAID, nonsteroidal anti-inflammatory drug; URI, upper respiratory infection

**Note:** This table was copied from Levine DM, Linder JA, Landon BE. The Quality of Outpatient Care Delivered to Adults in the United States, 2002 to 2013. *JAMA Intern Med.* 2016;176(12):1778. The references to Figures, Methods, and Appendices refers to the original paper.

**eTable 2.** Outpatient Quality, Experience, Utilization, and Cost Before (2011-2013) the Affordable Care Act

|                                                             | <400% FPL              |                   | ≥400% FPL        |                  | Difference-in-differences |              |
|-------------------------------------------------------------|------------------------|-------------------|------------------|------------------|---------------------------|--------------|
|                                                             | 2011<br>(n=14477)      | 2013<br>(n=15246) | 2011<br>(n=5609) | 2013<br>(n=5846) | Unadjusted                | p            |
|                                                             | <b>Mean % (95% CI)</b> |                   |                  |                  |                           |              |
| <b>High-Value Care</b>                                      |                        |                   |                  |                  |                           |              |
| Cancer screening                                            | 74 (73,75)             | 72 (71,74)        | 81 (79,82)       | 79 (77,80)       | 0.38                      | 0.80         |
| Diagnostic and preventive testing                           | 71 (70,72)             | 70 (69,71)        | 84 (83,85)       | 83 (82,84)       | -0.24                     | 0.76         |
| Diabetes care                                               | 63 (60,66)             | 59 (56,62)        | 71 (67,75)       | 73 (69,77)       | -5.09                     | 0.17         |
| Counseling                                                  | 44 (43,45)             | 45 (44,46)        | 50 (48,52)       | 50 (48,52)       | 0.98                      | 0.56         |
| Medical treatments                                          | 35 (33,37)             | 33 (31,35)        | 41 (38,43)       | 41 (39,44)       | -2.44                     | 0.27         |
| <b>Low-Value Care</b>                                       |                        |                   |                  |                  |                           |              |
| Antibiotic use                                              | 62 (58,67)             | 59 (54,63)        | 64 (59,69)       | 55 (50,61)       | 4.80                      | 0.33         |
| Medical treatments                                          | 12 (11,14)             | 14 (13,15)        | 8 (6,9)          | 8 (7,10)         | 1.26                      | 0.34         |
| Imaging                                                     | 9 (7,10)               | 9 (7,11)          | 8 (6,10)         | 10 (7,13)        | -2.08                     | 0.39         |
| <b>Respondent Experience</b>                                |                        |                   |                  |                  |                           |              |
| Global rating of health care                                | 68 (67,70)             | 70 (69,72)        | 80 (78,82)       | 80 (78,82)       | 2.64                      | 0.15         |
| Physician communication                                     | 56 (55,58)             | 59 (57,60)        | 64 (62,66)       | 65 (63,66)       | 1.41                      | 0.36         |
| Access to care                                              | 49 (48,51)             | 52 (50,54)        | 59 (57,61)       | 60 (58,63)       | 1.93                      | 0.31         |
| <b>Utilization</b>                                          |                        |                   |                  |                  |                           |              |
| Encounters, mean # per year<br>(95% CI)                     |                        |                   |                  |                  |                           |              |
| Office visits                                               | 4.3 (4.4,4.5)          | 4.6 (4.4,4.8)     | 5.5 (5.2,5.9)    | 5.7 (5.4,6)      | 0.18                      | 0.58         |
| Emergency department visits                                 | 0.2 (0.2,0.2)          | 0.3 (0.2,0.3)     | 0.1 (0.1,0.1)    | 0.1 (0.1,0.1)    | <b>0.04</b>               | <b>0.004</b> |
| Hospital admissions                                         | 0.1 (0.1,0.1)          | 0.1 (0.1,0.1)     | 0.1 (0.1,0.1)    | 0.1 (0,0.1)      | <b>0.02</b>               | <b>0.048</b> |
| Prescribed medicines, mean total<br>fills per year (95% CI) | 10.5 (9.9,11.1)        | 10.2 (9.6,10.8)   | 9.4 (8.8,10)     | 8.7 (8.1,9.4)    | 0.30                      | 0.63         |
| Preventive visit within past year                           | 58 (57,60)             | 57 (56,59)        | 69 (67,71)       | 69 (67,70)       | -0.63                     | 0.66         |
| Has primary care                                            | 67 (65,68)             | 63 (62,65)        | 80 (78,81)       | 80 (78,81)       | <b>-3.21</b>              | <b>0.02</b>  |
| <b>Cost</b>                                                 |                        |                   |                  |                  |                           |              |
| Total <sup>a</sup>                                          | 3787 (3485,4089)       | 3993 (3727,4259)  | 4599 (4122,5077) | 4219 (3902,4536) | 586.45                    | 0.11         |
| Office-based <sup>a</sup>                                   | 855 (793,916)          | 931 (868,994)     | 1229 (1128,1330) | 1218 (1123,1313) | 87.58                     | 0.29         |
| HOD-based <sup>a</sup>                                      | 352 (300,404)          | 314 (270,357)     | 525 (446,604)    | 479 (368,591)    | 8.05                      | 0.91         |
| Inpatient-based <sup>a</sup>                                | 1069 (952,1186)        | 1183 (988,1378)   | 1220 (850,1590)  | 885 (698,1072)   | 448.91                    | 0.08         |
| Prescriptions <sup>a</sup>                                  | 992 (749,1235)         | 944 (834,1054)    | 964 (848,1080)   | 959 (809,1108)   | -42.49                    | 0.79         |
| Out of pocket, total                                        | 515 (480,550)          | 494 (458,530)     | 734 (685,782)    | 789 (725,853)    | -75.80                    | 0.11         |
| Out of pocket, office-based                                 | 130 (117,143)          | 129 (117,140)     | 223 (202,244)    | 273 (230,317)    | -51.08                    | 0.06         |
| Out of pocket, HOD-based                                    | 33 (24,43)             | 27 (19,35)        | 48 (34,62)       | 45 (35,56)       | -4.15                     | 0.70         |

|                                | <400% FPL              |                   | ≥400% FPL        |                  | Difference-in-differences |      |
|--------------------------------|------------------------|-------------------|------------------|------------------|---------------------------|------|
|                                | 2011<br>(n=14477)      | 2013<br>(n=15246) | 2011<br>(n=5609) | 2013<br>(n=5846) | Unadjusted                | p    |
|                                | <b>Mean % (95% CI)</b> |                   |                  |                  |                           |      |
| Out of pocket, inpatient-based | 49 (33,65)             | 45 (27,63)        | 34 (25,44)       | 53 (26,81)       | -23.13                    | 0.25 |
| Out of pocket, prescriptions   | 169 (155,182)          | 141 (125,157)     | 209 (191,228)    | 179 (159,198)    | 2.79                      | 0.88 |

<sup>a</sup> Includes out-of-pocket expenditures

**Note:** bold signifies p < 0.05.

**eTable 3.** Outpatient Quality, Experience, Utilization, and Cost Before (2011-2013) and After (2016) the Affordable Care Act

|                                                          | <400% FPL               |                        | ≥400% FPL               |                        | <400% FPL      |                  |                |                  |
|----------------------------------------------------------|-------------------------|------------------------|-------------------------|------------------------|----------------|------------------|----------------|------------------|
|                                                          | Before ACA<br>(n=45811) | After ACA<br>(n=13442) | Before ACA<br>(n=45811) | After ACA<br>(n=13442) | Unadjusted     | p                | Adjusted       | p                |
|                                                          | Mean % (95% CI)         |                        |                         |                        |                |                  |                |                  |
| <b>High-Value Care</b>                                   |                         |                        |                         |                        |                |                  |                |                  |
| Cancer screening                                         | 73 (72-74)              | 74 (73-75)             | 80 (79-81)              | 80 (78-81)             | 0.37           | 0.77             | 0.70           | 0.60             |
| Diagnostic and preventive testing                        | 70 (70-71)              | 73 (72-74)             | 84 (83-84)              | 84 (83-85)             | <b>3.06</b>    | <b>&lt;0.001</b> | <b>1.83</b>    | <b>0.009</b>     |
| Diabetes care                                            | 62 (60-63)              | 58 (55-61)             | 72 (69-74)              | 65 (62-68)             | -1.31          | 0.69             | 1.18           | 0.70             |
| Counseling                                               | 45 (44-46)              | 44 (43-46)             | 50 (48-51)              | 48 (46-51)             | 1.04           | 0.47             | -1.09          | 0.38             |
| Medical treatments                                       | 34 (33-36)              | 34 (32-36)             | 41 (39-43)              | 39 (36-42)             | 1.91           | 0.34             | 0.62           | 0.74             |
| <b>Low-Value Care</b>                                    |                         |                        |                         |                        |                |                  |                |                  |
| Antibiotic use                                           | 62 (59-64)              | 51 (44-58)             | 59 (56-63)              | 49 (42-56)             | -0.12          | 0.98             | -3.70          | 0.56             |
| Medical treatments                                       | 13 (12-14)              | 12 (11-13)             | 8 (7-9)                 | 9 (8-11)               | -2.27          | 0.06             | <b>-2.94</b>   | <b>0.03</b>      |
| Imaging                                                  | 9 (8-10)                | 9 (7-11)               | 9 (8-10)                | 10 (7-13)              | -1.08          | 0.59             | -1.51          | 0.46             |
| <b>Respondent Experience</b>                             |                         |                        |                         |                        |                |                  |                |                  |
| Global rating of health care                             | 69 (68-70)              | 74 (73-76)             | 79 (78-81)              | 80 (79,82)             | <b>4.12</b>    | <b>0.004</b>     | <b>2.63</b>    | <b>0.046</b>     |
| Physician communication                                  | 57 (57-58)              | 63 (62-65)             | 64 (63-65)              | 68 (66,69)             | 2.25           | 0.11             | 0.73           | 0.60             |
| Access to care                                           | 50 (49-51)              | 56 (54-57)             | 59 (58-61)              | 59 (57,62)             | <b>5.65</b>    | <b>&lt;0.001</b> | <b>4.44</b>    | <b>0.009</b>     |
| <b>Utilization</b>                                       |                         |                        |                         |                        |                |                  |                |                  |
| Encounters, mean # per year (95% CI)                     |                         |                        |                         |                        |                |                  |                |                  |
| Office visits                                            | 4.3 (4.2-4.5)           | 4.4 (4.2-4.7)          | 5.5 (5.3-5.8)           | 5.5 (5.2-5.8)          | 0.14           | 0.56             | 0.07           | 0.73             |
| Emergency department visits                              | 0.2 (0.2-0.2)           | 0.2 (0.2-0.2)          | 0.1 (0.1-0.1)           | 0.1 (0.1-0.1)          | -0.01          | 0.23             | 0.00           | 0.95             |
| Hospital admissions                                      | 0.1 (0.1-0.1)           | 0.1 (0.1-0.1)          | 0.1 (0.1-0.1)           | 0 (0-0.1)              | 0.00           | 0.63             | 0.01           | 0.43             |
| Prescribed medicines, mean total fills per year (95% CI) | 10.2 (9.8-10.7)         | 9.9 (9.4-10.4)         | 9.0 (8.5-9.4)           | 8.1 (7.6-8.6)          | 0.49           | 0.24             | 0.13           | 0.71             |
| Preventive visit within past year                        | 58 (57-59)              | 61 (60-62)             | 69 (68-70)              | 70 (69-72)             | 1.49           | 0.24             | 0.17           | 0.90             |
| Has primary care                                         | 65 (64-66)              | 66 (65-68)             | 80 (78-81)              | 76 (74-77)             | <b>5.08</b>    | <b>&lt;0.001</b> | <b>3.98</b>    | <b>0.001</b>     |
| <b>Cost</b>                                              |                         |                        |                         |                        |                |                  |                |                  |
| Total <sup>a</sup>                                       | 3871 (3678-4063)        | 4313 (3971-4655)       | 4401 (4120-4683)        | 4524 (4178-4870)       | 319.42         | 0.26             | 392.11         | 0.17             |
| Office-based <sup>a</sup>                                | 867 (824-911)           | 945 (851-1040)         | 1206 (1146-1265)        | 1423 (1266-1579)       | -138.77        | 0.15             | -21.71         | 0.81             |
| HOD-based <sup>a</sup>                                   | 327 (296-357)           | 402 (299-505)          | 531 (452-610)           | 559 (440-679)          | 47.64          | 0.57             | 47.30          | 0.56             |
| Inpatient-based <sup>a</sup>                             | 1170 (1069-1270)        | 1225 (1039-1412)       | 1061 (876-1246)         | 843 (676-1009)         | 274.22         | 0.09             | <b>420.33</b>  | <b>0.02</b>      |
| Prescriptions <sup>a</sup>                               | 944 (830-1057)          | 1120 (1014-1226)       | 957 (863-1052)          | 998 (859-1137)         | 135.54         | 0.25             | -7.22          | 0.96             |
| Out of pocket, total                                     | 504 (477-530)           | 428 (397-459)          | 757 (719-794)           | 811 (760-862)          | <b>-129.49</b> | <b>&lt;0.001</b> | <b>-191.02</b> | <b>&lt;0.001</b> |

|                                | <400% FPL               |                        | ≥400% FPL               |                        | <400% FPL     |                  |               |                  |
|--------------------------------|-------------------------|------------------------|-------------------------|------------------------|---------------|------------------|---------------|------------------|
|                                | Before ACA<br>(n=45811) | After ACA<br>(n=13442) | Before ACA<br>(n=45811) | After ACA<br>(n=13442) | Unadjusted    | p                | Adjusted      | p                |
| Out of pocket, office-based    | 126 (118-134)           | 131 (117-144)          | 239 (220-257)           | 308 (280-336)          | <b>-64.54</b> | <b>&lt;0.001</b> | <b>-85.08</b> | <b>&lt;0.001</b> |
| Out of pocket, HOD-based       | 29 (24-35)              | 20 (16-25)             | 46 (38-54)              | 52 (42-61)             | <b>-14.71</b> | <b>0.03</b>      | -15.42        | 0.06             |
| Out of pocket, inpatient-based | 49 (36-61)              | 29 (20-38)             | 50 (33-67)              | 38 (27-48)             | -8.03         | 0.50             | -2.00         | 0.89             |
| Out of pocket, prescriptions   | 156 (145-167)           | 118 (104-132)          | 200 (187-213)           | 151 (134-168)          | 11.08         | 0.40             | -12.96        | 0.31             |

<sup>a</sup> Includes out-of-pocket expenditures

**Note:** bold signifies  $p < 0.05$ .

**Note:** regression adjusted for each year, age, gender, race/ethnicity, census region, partner status, education status, health status, employed status, smoking status, ADLs, iADLs, SF-12 PCS, SF-12 MCS, BMI, Kessler, hypertension, dyslipidemia, diabetes, chronic obstructive pulmonary disease, coronary artery disease or myocardial infarction, cancer, asthma, arthritis, frequency of chronic disease, and primary care. Adjustment did not include primary care for the “Has primary care” outcome.



**eTable 4.** Expanded Measures of Outpatient Quality, Experience, Utilization, and Cost Before (2011-2013) and After (2016) the Affordable Care Act

|                                                        | <400% FPL               |               |                        |               | ≥400% FPL               |               |                       |            | Difference in differences |                  |             |              |
|--------------------------------------------------------|-------------------------|---------------|------------------------|---------------|-------------------------|---------------|-----------------------|------------|---------------------------|------------------|-------------|--------------|
|                                                        | Before ACA<br>(n=45811) |               | After ACA<br>(n=13442) |               | Before ACA<br>(n=17693) |               | After ACA<br>(n=6212) |            |                           |                  |             |              |
| Measure or Composite                                   | n                       | Mean (95% CI) | n                      | Mean (95% CI) | n                       | Mean (95% CI) |                       |            | Unadjusted                | p                | Adjusted    | p            |
| High-value cancer screening composite                  | 26027                   | 73 (72-74)    | 7749                   | 74 (73-75)    | 10752                   | 80 (79-81)    | 3721                  | 80 (78-81) | 0.37                      | 0.77             | 0.70        | 0.60         |
| Cervical cancer screening                              | 19137                   | 85 (84-86)    | 5554                   | 83 (82-85)    | 6426                    | 91 (90-92)    | 2283                  | 90 (89-91) | -0.47                     | 0.67             | -0.53       | 0.65         |
| Breast cancer screening                                | 5886                    | 71 (69-73)    | 1932                   | 73 (70-75)    | 3289                    | 84 (82-86)    | 1130                  | 84 (82-86) | 1.83                      | 0.36             | 2.27        | 0.27         |
| Colorectal cancer screening                            | 10925                   | 50 (48-51)    | 3514                   | 55 (52-57)    | 6661                    | 66 (64-68)    | 2238                  | 67 (64-70) | 3.68                      | 0.08             | 1.81        | 0.39         |
| High-value diagnostic and preventive testing composite | 45284                   | 70 (70-71)    | 13223                  | 73 (72-74)    | 17470                   | 84 (83-84)    | 6135                  | 84 (83-85) | <b>3.06</b>               | <b>&lt;0.001</b> | <b>1.83</b> | <b>0.009</b> |
| Dental checkup                                         | 45109                   | 52 (51-53)    | 13151                  | 56 (54-58)    | 17399                   | 79 (78-80)    | 6115                  | 78 (76-79) | <b>5.16</b>               | <b>&lt;0.001</b> | <b>2.95</b> | <b>0.02</b>  |
| Blood pressure measurement                             | 43961                   | 87 (86-87)    | 12871                  | 89 (88-90)    | 17011                   | 93 (93-94)    | 6006                  | 94 (93-94) | <b>1.87</b>               | <b>0.005</b>     | 0.74        | 0.30         |
| Cholesterol measurement                                | 24490                   | 90 (90-91)    | 7491                   | 92 (91-93)    | 11996                   | 96 (95-97)    | 4233                  | 97 (96-97) | 0.88                      | 0.26             | 0.85        | 0.29         |
| Influenza vaccine                                      | 11093                   | 42 (41-44)    | 3518                   | 47 (45-49)    | 6725                    | 53 (51-55)    | 2229                  | 50 (48-53) | <b>6.93</b>               | <b>&lt;0.001</b> | <b>5.79</b> | <b>0.006</b> |
| High-value diabetes care composite                     | 3095                    | 62 (60-63)    | 989                    | 58 (55-61)    | 932                     | 72 (69-74)    | 322                   | 65 (62-68) | -1.31                     | 0.69             | 1.18        | 0.70         |
| A1c measurement                                        | 1975                    | 71 (68-75)    | 734                    | 71 (67-75)    | 749                     | 79 (75-83)    | 274                   | 75 (68-81) | 3.80                      | 0.41             | 7.24        | 0.14         |
| Foot exam                                              | 3043                    | 64 (61-66)    | 978                    | 59 (55-63)    | 919                     | 68 (65-72)    | 321                   | 70 (64-76) | -6.68                     | 0.12             | -4.79       | 0.26         |
| Eye exam                                               | 3065                    | 54 (52-57)    | 978                    | 52 (49-56)    | 927                     | 70 (66-75)    | 320                   | 68 (62-74) | 0.47                      | 0.92             | 2.70        | 0.58         |

|                                                               | <400% FPL               |               |                        |               | ≥400% FPL               |               |                       |            | Difference in differences |                  |               |                  |
|---------------------------------------------------------------|-------------------------|---------------|------------------------|---------------|-------------------------|---------------|-----------------------|------------|---------------------------|------------------|---------------|------------------|
|                                                               | Before ACA<br>(n=45811) |               | After ACA<br>(n=13442) |               | Before ACA<br>(n=17693) |               | After ACA<br>(n=6212) |            |                           |                  |               |                  |
| Measure or Composite                                          | n                       | Mean (95% CI) | n                      | Mean (95% CI) | n                       | Mean (95% CI) |                       |            | Unadjusted                | p                | Adjusted      | p                |
| High-value counseling composite                               | 31762                   | 45 (44-46)    | 9500                   | 44 (43-46)    | 11095                   | 50 (48-51)    | 3965                  | 48 (46-51) | 1.04                      | 0.47             | -1.09         | 0.38             |
| Weight loss counseling                                        | 29055                   | 39 (37-40)    | 8827                   | 36 (35-38)    | 10503                   | 45 (44-47)    | 3790                  | 43 (40-45) | 0.38                      | 0.82             | -1.81         | 0.25             |
| Exercise counseling                                           | 29100                   | 46 (45-47)    | 8862                   | 48 (47-50)    | 10533                   | 52 (50-53)    | 3800                  | 53 (50-55) | 1.25                      | 0.41             | -0.52         | 0.72             |
| Smoking cessation counseling                                  | 7128                    | 60 (59-62)    | 1786                   | 59 (57-62)    | 1421                    | 67 (63-70)    | 415                   | 64 (58-71) | 1.39                      | 0.72             | -2.02         | 0.63             |
| High-value medical treatment composite                        | 9298                    | 34 (33-36)    | 2770                   | 34 (32-36)    | 4365                    | 41 (39-43)    | 1416                  | 39 (36-42) | 1.91                      | 0.34             | 0.62          | 0.74             |
| Anticoagulation for atrial fibrillation                       | 517                     | 19 (14-24)    | 36                     | 65*           | 268                     | 19 (13-26)    | 23                    | 50*        | <b>16.08</b>              | <b>0.004</b>     | 9.90          | 0.13             |
| ACEi/ARB for heart failure                                    | 175                     | 65*           | 49                     | 68*           | 29                      | 58*           | 8                     | 47*        | <b>13.46</b>              | <b>&lt;0.001</b> | <b>21.68</b>  | <b>&lt;0.001</b> |
| Beta blocker for heart failure                                | 175                     | 69*           | 49                     | 70*           | 29                      | 82*           | 8                     | 58*        | <b>25.32</b>              | <b>&lt;0.001</b> | <b>1.70</b>   | <b>&lt;0.001</b> |
| Salicylates and/or platelet aggregation inhibitors for CAD/MI | 1410                    | 33 (29-37)    | 313                    | 33 (27-40)    | 430                     | 28 (22-34)    | 90                    | 37 (26-48) | -8.62                     | 0.23             | <b>-18.33</b> | <b>&lt;0.001</b> |
| Beta blocker for CAD/MI                                       | 1410                    | 52 (48-57)    | 313                    | 55 (48-63)    | 430                     | 58 (51-65)    | 90                    | 65 (53-76) | -3.98                     | 0.60             | -4.72         | 0.24             |
| Statin for CAD/MI                                             | 1410                    | 52 (48-56)    | 313                    | 62 (55-68)    | 430                     | 70 (64-75)    | 90                    | 73 (60-85) | 6.44                      | 0.40             | 8.22          | 0.07             |
| Statin for dyslipidemia                                       | 5479                    | 64 (62-66)    | 1660                   | 65 (62-68)    | 2926                    | 68 (66-71)    | 956                   | 66 (62-70) | 4.33                      | 0.15             | 3.40          | 0.27             |

|                                                    | <400% FPL               |               |                        |               | ≥400% FPL               |               |                       |            | Difference in differences |                  |               |                  |
|----------------------------------------------------|-------------------------|---------------|------------------------|---------------|-------------------------|---------------|-----------------------|------------|---------------------------|------------------|---------------|------------------|
|                                                    | Before ACA<br>(n=45811) |               | After ACA<br>(n=13442) |               | Before ACA<br>(n=17693) |               | After ACA<br>(n=6212) |            |                           |                  |               |                  |
| Measure or Composite                               | n                       | Mean (95% CI) | n                      | Mean (95% CI) | n                       | Mean (95% CI) |                       |            | Unadjusted                | p                | Adjusted      | p                |
| ACEi/ARB for diabetes & hypertension               | 2465                    | 57 (54-61)    | 791                    | 65 (60-70)    | 773                     | 57 (51-62)    | 262                   | 57 (50-65) | 7.12                      | 0.22             | 7.38          | 0.24             |
| Statin for CVA                                     | 396                     | 46 (37-54)    | 21                     | 55*           | 81                      | 50 (36-65)    | 3                     | 28*        | <b>32.59</b>              | <b>&lt;0.001</b> | <b>21.02</b>  | <b>&lt;0.001</b> |
| Antiplatelet for CVA                               | 396                     | 29 (22-36)    | 21                     | 8*            | 81                      | 26 (14-38)    | 3                     | 47*        | <b>-41.41</b>             | <b>&lt;0.001</b> | <b>-37.68</b> | <b>&lt;0.001</b> |
| Controller medication for poorly controlled asthma | 349                     | 48 (40-55)    | 115                    | 41*           | 128                     | 65 (53-76)    | 57                    | 55*        | 3.11                      | 0.47             | 1.62          | 0.47             |
| Controller medication for poorly controlled COPD   | 308                     | 24 (18-30)    | 60                     | 44*           | 111                     | 24 (14-34)    | 10                    | 20*        | <b>23.76</b>              | <b>&lt;0.001</b> | <b>17.26</b>  | <b>&lt;0.001</b> |
| Low-value antibiotic use composite                 | 1887                    | 62 (59-64)    | 419                    | 51 (44-58)    | 1369                    | 59 (56-63)    | 316                   | 49 (42-56) | -0.12                     | 0.98             | -3.70         | 0.56             |
| Antibiotics for acute upper respiratory infection  | 1526                    | 66 (63-69)    | 263                    | 63 (55-71)    | 1166                    | 63 (60-67)    | 225                   | 62 (54-70) | -1.85                     | 0.77             | -2.27         | 0.74             |
| Antibiotics for influenza                          | 375                     | 41 (34-49)    | 165                    | 25*           | 224                     | 36 (26-46)    | 103                   | 16*        | <b>3.64</b>               | <b>0.02</b>      | -3.34         | 0.15             |
| Low-value medical treatment composite              | 12230                   | 13 (12-14)    | 3696                   | 12 (11-13)    | 5057                    | 8 (7-9)       | 1713                  | 9 (8-11)   | -2.27                     | 0.06             | <b>-2.94</b>  | <b>0.03</b>      |
| Benzodiazepine for depression                      | 3993                    | 11 (9-12)     | 1357                   | 8 (6-9)       | 1139                    | 8 (6-10)      | 430                   | 13 (9-17)  | <b>-8.00</b>              | <b>0.001</b>     | <b>-10.22</b> | <b>&lt;0.001</b> |
| Opioid for headache                                | 575                     | 1 (0-2)       | 141                    | 2*            | 244                     | 0 (0-1)       | 66                    | 1*         | 0.32                      | 0.67             | <b>-1.06</b>  | <b>&lt;0.001</b> |
| Opioid for back pain                               | 1722                    | 7 (5-8)       | 500                    | 6 (3-9)       | 1033                    | 3 (1-4)       | 351                   | 2 (0-3)    | -0.14                     | 0.94             | -0.12         | 0.95             |

|                                                              | <400% FPL               |               |                        |               | ≥400% FPL               |               |                       |            | Difference in differences |              |             |              |
|--------------------------------------------------------------|-------------------------|---------------|------------------------|---------------|-------------------------|---------------|-----------------------|------------|---------------------------|--------------|-------------|--------------|
|                                                              | Before ACA<br>(n=45811) |               | After ACA<br>(n=13442) |               | Before ACA<br>(n=17693) |               | After ACA<br>(n=6212) |            |                           |              |             |              |
| Measure or Composite                                         | n                       | Mean (95% CI) | n                      | Mean (95% CI) | n                       | Mean (95% CI) |                       |            | Unadjusted                | p            | Adjusted    | p            |
| NSAID use for hypertension, heart failure, or kidney disease | 8395                    | 18 (17-19)    | 2512                   | 18 (16-20)    | 3435                    | 11 (10-12)    | 1129                  | 11 (9-14)  | -0.91                     | 0.61         | -0.98       | 0.61         |
| Low-value imaging composite                                  | 2251                    | 9 (8-10)      | 715                    | 9 (7-11)      | 1252                    | 9 (8-10)      | 443                   | 10 (7-13)  | -1.08                     | 0.59         | -1.51       | 0.46         |
| MRI/CT for back pain                                         | 1722                    | 6 (5-7)       | 500                    | 4 (2-6)       | 1033                    | 5 (4-7)       | 351                   | 4 (1-7)    | -1.19                     | 0.56         | -1.45       | 0.49         |
| X-ray for back pain                                          | 1722                    | 12 (11-14)    | 500                    | 14 (10-17)    | 1033                    | 13 (11-15)    | 351                   | 15 (10-20) | -0.50                     | 0.88         | 0.20        | 0.95         |
| MRI/CT for headache                                          | 575                     | 7 (4-10)      | 260                    | 8 (4-12)      | 244                     | 8 (4-12)      | 105                   | 11 (4-18)  | -1.95                     | 0.69         | -3.78       | 0.33         |
| Respondent experience: global rating of health care          | 23442                   | 69 (68-70)    | 6178                   | 74 (73-76)    | 11386                   | 79 (78-81)    | 3506                  | 80 (79-82) | <b>4.12</b>               | <b>0.004</b> | <b>2.63</b> | <b>0.046</b> |
| Respondent experience: doctor communication composite        | 23802                   | 57 (57-58)    | 6284                   | 63 (62-65)    | 11463                   | 64 (63-65)    | 3526                  | 68 (66-69) | 2.25                      | 0.11         | 0.73        | 0.60         |
| Doctor listened to you                                       | 23482                   | 59 (58-60)    | 6169                   | 64 (62-65)    | 11406                   | 65 (64-67)    | 3501                  | 67 (65-70) | 2.58                      | 0.12         | 1.20        | 0.47         |
| Doctor explained so you understood                           | 23694                   | 59 (58-60)    | 6255                   | 66 (64-67)    | 11447                   | 66 (65-68)    | 3523                  | 69 (67-71) | <b>3.30</b>               | <b>0.04</b>  | 1.79        | 0.26         |
| Doctor showed respect                                        | 23657                   | 63 (61-64)    | 6247                   | 68 (66-70)    | 11436                   | 69 (68-70)    | 3515                  | 73 (71-75) | 1.11                      | 0.48         | -0.42       | 0.78         |
| Doctor spent enough time with you                            | 23633                   | 49 (48-50)    | 6234                   | 56 (54-58)    | 11430                   | 55 (54-57)    | 3515                  | 60 (58-62) | 2.10                      | 0.22         | 0.43        | 0.81         |

|                                                          | <400% FPL               |                  |                        |                  | ≥400% FPL               |                  |                       |                  | Difference in differences |                  |             |              |
|----------------------------------------------------------|-------------------------|------------------|------------------------|------------------|-------------------------|------------------|-----------------------|------------------|---------------------------|------------------|-------------|--------------|
|                                                          | Before ACA<br>(n=45811) |                  | After ACA<br>(n=13442) |                  | Before ACA<br>(n=17693) |                  | After ACA<br>(n=6212) |                  |                           |                  |             |              |
| Measure or Composite                                     | n                       | Mean (95% CI)    | n                      | Mean (95% CI)    | n                       | Mean (95% CI)    |                       |                  | Unadjusted                | p                | Adjusted    | p            |
| Respondent experience: access to care composite          | 23414                   | 50 (49-51)       | 6057                   | 56 (54-57)       | 11083                   | 59 (58-61)       | 3407                  | 59 (57-62)       | <b>5.65</b>               | <b>&lt;0.001</b> | <b>4.44</b> | <b>0.009</b> |
| Got care when ill or injured as soon as wanted           | 11189                   | 53 (52-55)       | 2617                   | 59 (57-62)       | 3744                    | 68 (66-70)       | 1108                  | 72 (68-75)       | 2.58                      | 0.31             | 0.03        | 0.99         |
| Got medical appointment as soon as wanted                | 20448                   | 49 (48-51)       | 5401                   | 55 (53-57)       | 10398                   | 57 (56-59)       | 3217                  | 57 (54-60)       | <b>5.84</b>               | <b>0.002</b>     | <b>4.90</b> | <b>0.01</b>  |
| <b>Utilization</b>                                       |                         |                  |                        |                  |                         |                  |                       |                  |                           |                  |             |              |
| Encounters, mean # per year (95% CI)                     |                         |                  |                        |                  |                         |                  |                       |                  |                           |                  |             |              |
| Office visits                                            | 45811                   | 4.3 (4.2-4.5)    | 13442                  | 4.4 (4.2-4.7)    | 17693                   | 5.5 (5.3-5.8)    | 6212                  | 5.5 (5.2-5.8)    | 0.14                      | 0.56             | 0.07        | 0.73         |
| Emergency department visits                              | 45811                   | 0.2 (0.2-0.2)    | 13442                  | 0.2 (0.2-0.2)    | 17693                   | 0.1 (0.1-0.1)    | 6212                  | 0.1 (0.1-0.1)    | -0.01                     | 0.23             | 0.00        | 0.95         |
| Hospital admissions                                      | 45811                   | 0.1 (0.1-0.1)    | 13442                  | 0.1 (0.1-0.1)    | 17693                   | 0.1 (0.1-0.1)    | 6212                  | 0 (0-0.1)        | 0.00                      | 0.63             | 0.01        | 0.43         |
| Prescribed medicines, mean total fills per year (95% CI) | 45811                   | 10.2 (9.8-10.7)  | 13442                  | 9.9 (9.4-10.4)   | 17693                   | 9.0 (8.5-9.4)    | 6212                  | 8.1 (7.6-8.6)    | 0.49                      | 0.24             | 0.13        | 0.71         |
| Preventive visit within past year                        | 43741                   | 58 (57-59)       | 12835                  | 61 (60-62)       | 16935                   | 69 (68-70)       | 5991                  | 70 (69-72)       | 1.49                      | 0.24             | 0.17        | 0.90         |
| Has primary care                                         | 42923                   | 65 (64-66)       | 12592                  | 66 (65-68)       | 16527                   | 80 (78-81)       | 5749                  | 76 (74-77)       | <b>5.08</b>               | <b>&lt;0.001</b> | <b>3.98</b> | <b>0.001</b> |
| <b>Cost</b>                                              |                         |                  |                        |                  |                         |                  |                       |                  |                           |                  |             |              |
| Total <sup>c</sup>                                       | 45811                   | 3871 (3678-4063) | 13442                  | 4313 (3971-4655) | 17693                   | 4401 (4120-4683) | 6212                  | 4524 (4178-4870) | 319.42                    | 0.26             | 392.11      | 0.17         |

|                                | <400% FPL               |                  |                        |                  | ≥400% FPL               |                  |                       |                  | Difference in differences |                  |                |                  |
|--------------------------------|-------------------------|------------------|------------------------|------------------|-------------------------|------------------|-----------------------|------------------|---------------------------|------------------|----------------|------------------|
|                                | Before ACA<br>(n=45811) |                  | After ACA<br>(n=13442) |                  | Before ACA<br>(n=17693) |                  | After ACA<br>(n=6212) |                  |                           |                  |                |                  |
| Measure or Composite           | n                       | Mean (95% CI)    | n                      | Mean (95% CI)    | n                       | Mean (95% CI)    |                       |                  | Unadjusted                | p                | Adjusted       | p                |
| Office-based <sup>c</sup>      | 45811                   | 867 (824-911)    | 13442                  | 945 (851-1040)   | 17693                   | 1206 (1146-1265) | 6212                  | 1423 (1266-1579) | -138.77                   | 0.15             | -21.71         | 0.81             |
| HOD-based <sup>c</sup>         | 45811                   | 327 (296-357)    | 13442                  | 402 (299-505)    | 17693                   | 531 (452-610)    | 6212                  | 559 (440-679)    | 47.64                     | 0.57             | 47.30          | 0.56             |
| Inpatient-based <sup>c</sup>   | 45811                   | 1170 (1069-1270) | 13442                  | 1225 (1039-1412) | 17693                   | 1061 (876-1246)  | 6212                  | 843 (676-1009)   | 274.22                    | 0.09             | <b>420.33</b>  | <b>0.02</b>      |
| Prescriptions <sup>c</sup>     | 45811                   | 944 (830-1057)   | 13442                  | 1120 (1014-1226) | 17693                   | 957 (863-1052)   | 6212                  | 998 (859-1137)   | 135.54                    | 0.25             | -7.22          | 0.96             |
| Out of pocket, total           | 45811                   | 504 (477-530)    | 13442                  | 428 (397-459)    | 17693                   | 757 (719-794)    | 6212                  | 811 (760-862)    | <b>-129.49</b>            | <b>&lt;0.001</b> | <b>-191.02</b> | <b>&lt;0.001</b> |
| Out of pocket, office-based    | 45811                   | 126 (118-134)    | 13442                  | 131 (117-144)    | 17693                   | 239 (220-257)    | 6212                  | 308 (280-336)    | <b>-64.54</b>             | <b>&lt;0.001</b> | <b>-85.08</b>  | <b>&lt;0.001</b> |
| Out of pocket, HOD-based       | 45811                   | 29 (24-35)       | 13442                  | 20 (16-25)       | 17693                   | 46 (38-54)       | 6212                  | 52 (42-61)       | <b>-14.71</b>             | <b>0.03</b>      | -15.42         | 0.06             |
| Out of pocket, inpatient-based | 45811                   | 49 (36-61)       | 13442                  | 29 (20-38)       | 17693                   | 50 (33-67)       | 6212                  | 38 (27-48)       | -8.03                     | 0.50             | -2.00          | 0.89             |
| Out of pocket, prescriptions   | 45811                   | 156 (145-167)    | 13442                  | 118 (104-132)    | 17693                   | 200 (187-213)    | 6212                  | 151 (134-168)    | 11.08                     | 0.40             | -12.96         | 0.31             |

<sup>a</sup> Includes out-of-pocket expenditures

\* Sample size limited such that only one cluster in a stratum for given measure; variance and 95% CI cannot be calculated

**Note:** bold signifies p < 0.05.

**Note:** regression adjusted for each year, age, gender, race/ethnicity, census region, partner status, education status, health status, employed status, smoking status, ADLs, iADLs, SF-12 PCS, SF-12 MCS, BMI, Kessler, hypertension, dyslipidemia, diabetes, chronic obstructive pulmonary disease, coronary artery disease or myocardial infarction, cancer, asthma, arthritis, frequency of chronic disease, and primary care. Adjustment did not include primary care for the “Has primary care” outcome.

**eTable 5.** Expanded Measures of Outpatient Quality, Experience, Utilization, and Cost Before (2011-2013) and After (2014-2016) the Affordable Care Act

| Measure or Composite                                   | <400% FPL            |               |                     |               | ≥400% FPL            |               |                     |               | Difference in differences |                  |             |             |
|--------------------------------------------------------|----------------------|---------------|---------------------|---------------|----------------------|---------------|---------------------|---------------|---------------------------|------------------|-------------|-------------|
|                                                        | Before ACA (n=45811) |               | After ACA (n=41900) |               | Before ACA (n=17693) |               | After ACA (n=17767) |               |                           |                  |             |             |
|                                                        | n                    | Mean (95% CI) | n                   | Mean (95% CI) | n                    | Mean (95% CI) | n                   | Mean (95% CI) | Unadjusted                | p                | Adjusted    | p           |
| High-value cancer screening composite                  | 26027                | 73 (72-74)    | 24057               | 73 (73-74)    | 10752                | 80 (79-81)    | 10698               | 79 (78-80)    | 0.64                      | 0.48             | 0.99        | 0.26        |
| Cervical cancer screening                              | 19137                | 85 (84-86)    | 17459               | 84 (83-85)    | 6426                 | 91 (90-92)    | 6458                | 90 (90-91)    | 0.10                      | 0.91             | 0.29        | 0.74        |
| Breast cancer screening                                | 5886                 | 71 (69-73)    | 5869                | 72 (70-74)    | 3289                 | 84 (82-86)    | 3261                | 83 (82-85)    | 1.83                      | 0.26             | 2.41        | 0.14        |
| Colorectal cancer screening                            | 10925                | 50 (48-51)    | 10671               | 52 (51-54)    | 6661                 | 66 (64-68)    | 6576                | 66 (64-68)    | 2.46                      | 0.13             | 1.22        | 0.45        |
| High-value diagnostic and preventive testing composite | 45284                | 70 (70-71)    | 41299               | 72 (72-73)    | 17470                | 84 (83-84)    | 17562               | 84 (83-84)    | <b>2.18</b>               | <b>&lt;0.001</b> | <b>1.20</b> | <b>0.02</b> |
| Dental checkup                                         | 45109                | 52 (51-53)    | 41069               | 54 (53-56)    | 17399                | 79 (78-80)    | 17499               | 78 (76-79)    | <b>3.58</b>               | <b>&lt;0.001</b> | <b>2.23</b> | <b>0.02</b> |
| Blood pressure measurement                             | 43961                | 87 (86-87)    | 40279               | 88 (88-89)    | 17011                | 93 (93-94)    | 17189               | 94 (93-94)    | <b>1.52</b>               | <b>0.003</b>     | 0.60        | 0.25        |
| Cholesterol measurement                                | 24490                | 90 (90-91)    | 23073               | 92 (91-92)    | 11996                | 96 (95-97)    | 12053               | 97 (96-97)    | 0.99                      | 0.10             | 1.02        | 0.11        |
| Influenza vaccine                                      | 11093                | 42 (41-44)    | 10751               | 45 (43-46)    | 6725                 | 53 (51-55)    | 6577                | 52 (50-54)    | <b>3.46</b>               | <b>0.03</b>      | 1.85        | 0.25        |
| High-value diabetes care composite                     | 3095                 | 62 (60-63)    | 2995                | 59 (58-61)    | 932                  | 72 (69-74)    | 856                 | 71 (68-74)    | -1.34                     | 0.58             | -0.97       | 0.67        |
| A1c measurement                                        | 1975                 | 71 (68-75)    | 2138                | 70 (68-73)    | 749                  | 79 (75-83)    | 704                 | 77 (73-81)    | 1.07                      | 0.77             | 2.61        | 0.47        |
| Foot exam                                              | 3043                 | 64 (61-66)    | 2959                | 62 (60-64)    | 919                  | 68 (65-72)    | 848                 | 71 (67-75)    | <b>9.02</b>               | <b>&lt;0.001</b> | -4.07       | 0.16        |
| Eye exam                                               | 3065                 | 54 (52-57)    | 2967                | 52 (49-55)    | 927                  | 70 (66-75)    | 847                 | 68 (64-72)    | -0.14                     | 0.97             | -0.58       | 0.87        |

|                                                               | <400% FPL               |                     |                     |                  | ≥400% FPL               |                  |                        |                  | Difference in differences |                  |          |      |
|---------------------------------------------------------------|-------------------------|---------------------|---------------------|------------------|-------------------------|------------------|------------------------|------------------|---------------------------|------------------|----------|------|
|                                                               | Before ACA<br>(n=45811) |                     | After ACA (n=41900) |                  | Before ACA<br>(n=17693) |                  | After ACA<br>(n=17767) |                  |                           |                  |          |      |
| Measure or Composite                                          | n                       | Mean<br>(95%<br>CI) | n                   | Mean (95%<br>CI) | n                       | Mean (95%<br>CI) | n                      | Mean<br>(95% CI) | Unadjusted                | p                | Adjusted | p    |
| High-value counseling composite                               | 31762                   | 45 (44-46)          | 29395               | 45 (44-46)       | 11095                   | 50 (48-51)       | 11233                  | 49 (48-50)       | 0.86                      | 0.47             | -0.55    | 0.59 |
| Weight loss counseling                                        | 29055                   | 39 (37-40)          | 27237               | 37 (36-38)       | 10503                   | 45 (44-47)       | 10765                  | 44 (42-45)       | 0.29                      | 0.82             | -1.02    | 0.39 |
| Exercise counseling                                           | 29100                   | 46 (45-47)          | 27291               | 48 (47-49)       | 10533                   | 52 (50-53)       | 10793                  | 53 (51-55)       | 0.71                      | 0.59             | -0.61    | 0.61 |
| Smoking cessation counseling                                  | 7128                    | 60 (59-62)          | 5694                | 61 (59-63)       | 1421                    | 67 (63-70)       | 1179                   | 64 (60-68)       | 2.73                      | 0.34             | -0.11    | 0.97 |
| High-value medical treatment composite                        | 9298                    | 34 (33-36)          | 8875                | 34 (33-35)       | 4365                    | 41 (39-43)       | 4179                   | 39 (37-41)       | 2.06                      | 0.16             | 0.54     | 0.67 |
| Anticoagulation for atrial fibrillation                       | 517                     | 19 (14-24)          | 416                 | 31 (23-39)       | 268                     | 19 (13-26)       | 196                    | 23 (15-31)       | <b>8.78</b>               | <b>&lt;0.001</b> | 2.80     | 0.32 |
| ACEi/ARB for heart failure                                    | 175                     | 65*                 | 172                 | 63*              | 29                      | 58*              | 23                     | 67*              |                           |                  |          |      |
| Beta blocker for heart failure                                | 175                     | 69*                 | 172                 | 67*              | 29                      | 82*              | 23                     | 77*              |                           |                  |          |      |
| Salicylates and/or platelet aggregation inhibitors for CAD/MI | 1410                    | 33 (29-37)          | 1229                | 33 (29-37)       | 430                     | 28 (22-34)       | 349                    | 30 (23-36)       | -1.80                     | 0.71             | -8.67    | 0.07 |
| Beta blocker for CAD/MI                                       | 1410                    | 52 (48-57)          | 1229                | 53 (49-58)       | 430                     | 58 (51-65)       | 349                    | 51 (44-58)       | 7.68                      | 0.19             | 4.98     | 0.40 |
| Statin for CAD/MI                                             | 1410                    | 52 (48-56)          | 1229                | 56 (52-60)       | 430                     | 70 (64-75)       | 349                    | 63 (55-71)       | <b>10.69</b>              | <b>0.049</b>     | 4.44     | 0.29 |
| Statin for dyslipidemia                                       | 5479                    | 64 (62-66)          | 5206                | 64 (62-67)       | 2926                    | 68 (66-71)       | 2681                   | 67 (65-70)       | 1.66                      | 0.45             | 1.55     | 0.48 |



|                                                    | <400% FPL               |               |                     |               | ≥400% FPL               |               |                        |               | Difference in differences |                  |               |                  |
|----------------------------------------------------|-------------------------|---------------|---------------------|---------------|-------------------------|---------------|------------------------|---------------|---------------------------|------------------|---------------|------------------|
|                                                    | Before ACA<br>(n=45811) |               | After ACA (n=41900) |               | Before ACA<br>(n=17693) |               | After ACA<br>(n=17767) |               |                           |                  |               |                  |
| Measure or Composite                               | n                       | Mean (95% CI) | n                   | Mean (95% CI) | n                       | Mean (95% CI) | n                      | Mean (95% CI) | Unadjusted                | p                | Adjusted      | p                |
| ACEi/ARB for diabetes & hypertension               | 2465                    | 57 (54-61)    | 2518                | 63 (60-66)    | 773                     | 57 (51-62)    | 734                    | 61 (56-66)    | 1.53                      | 0.74             | 2.15          | 0.68             |
| Statin for CVA                                     | 396                     | 46 (37-54)    | 300                 | 57 (49-65)    | 81                      | 50 (36-65)    | 64                     | 49 (33-65)    | <b>12.68</b>              | <b>0.03</b>      | -2.63         | 0.42             |
| Antiplatelet for CVA                               | 396                     | 29 (22-36)    | 300                 | 18 (12-25)    | 81                      | 26 (14-38)    | 64                     | 41 (25-57)    | <b>-25.55</b>             | <b>&lt;0.001</b> | <b>-24.12</b> | <b>&lt;0.001</b> |
| Controller medication for poorly controlled asthma | 349                     | 48 (40-55)    | 405                 | 47 (40-53)    | 128                     | 65 (53-76)    | 177                    | 58 (48-67)    | <b>6.06</b>               | <b>0.13</b>      | <b>8.31</b>   | <b>0.009</b>     |
| Controller medication for poorly controlled COPD   | 308                     | 24 (18-30)    | 304                 | 36 (28-43)    | 111                     | 24 (14-34)    | 97                     | 30 (19-40)    | <b>5.94</b>               | <b>&lt;0.001</b> | 0.00          | 1.00             |
| Low-value antibiotic use composite                 | 1887                    | 62 (59-64)    | 1673                | 56 (52-59)    | 1369                    | 59 (56-63)    | 1284                   | 54 (51-57)    | -0.76                     | 0.82             | -4.35         | 0.20             |
| Antibiotics for acute upper respiratory infection  | 1526                    | 66 (63-69)    | 1283                | 63 (60-67)    | 1166                    | 63 (60-67)    | 1014                   | 61 (57-65)    | -0.18                     | 0.96             | -3.43         | 0.31             |
| Antibiotics for influenza                          | 375                     | 41 (34-49)    | 428                 | 27 (21-33)    | 224                     | 36 (26-46)    | 300                    | 28 (21-35)    | -6.10                     | 0.07             | <b>-9.09</b>  | <b>0.04</b>      |
| Low-value medical treatment composite              | 12230                   | 13 (12-14)    | 11567               | 13 (12-14)    | 5057                    | 8 (7-9)       | 5107                   | 9 (8-10)      | -0.40                     | 0.63             | -0.99         | 0.28             |
| Benzodiazepine for depression                      | 3993                    | 11 (9-12)     | 4094                | 8 (7-10)      | 1139                    | 8 (6-10)      | 1239                   | 9 (7-12)      | -3.40                     | 0.05             | -3.68         | 0.07             |
| Opioid for headache                                | 575                     | 1 (0-2)       | 512                 | 3 (1-6)       | 244                     | 0 (0-1)       | 224                    | 1 (-1-4)      | 1.06                      | 0.56             | -0.96         | <0.01            |
| Opioid for back pain                               | 1722                    | 7 (5-8)       | 1802                | 9 (7-11)      | 1033                    | 3 (1-4)       | 1179                   | 3 (2-5)       | 1.51                      | 0.32             | 0.54          | 0.74             |

|                                                              | <400% FPL               |                     |                     |                  | ≥400% FPL               |                  |                        |                  | Difference in differences |              |             |             |
|--------------------------------------------------------------|-------------------------|---------------------|---------------------|------------------|-------------------------|------------------|------------------------|------------------|---------------------------|--------------|-------------|-------------|
|                                                              | Before ACA<br>(n=45811) |                     | After ACA (n=41900) |                  | Before ACA<br>(n=17693) |                  | After ACA<br>(n=17767) |                  |                           |              |             |             |
| Measure or Composite                                         | n                       | Mean<br>(95%<br>CI) | n                   | Mean (95%<br>CI) | n                       | Mean (95%<br>CI) | n                      | Mean<br>(95% CI) | Unadjusted                | p            | Adjusted    | p           |
| NSAID use for hypertension, heart failure, or kidney disease | 8395                    | 18 (17-19)          | 7812                | 19 (18-21)       | 3435                    | 11 (10-12)       | 3297                   | 12 (11-14)       | 0.36                      | 0.76         | 0.05        | 0.97        |
| Low-value imaging composite                                  | 2251                    | 9 (8-10)            | 2333                | 10 (9-12)        | 1252                    | 9 (8-10)         | 1397                   | 9 (7-11)         | 1.73                      | 0.20         | 0.77        | 0.60        |
| MRI/CT for back pain                                         | 1722                    | 6 (5-7)             | 1802                | 7 (5-9)          | 1033                    | 5 (4-7)          | 1179                   | 5 (3-6)          | 1.46                      | 0.35         | 1.22        | 0.48        |
| X-ray for back pain                                          | 1722                    | 12 (11-14)          | 1802                | 15 (13-17)       | 1033                    | 13 (11-15)       | 1179                   | 13 (11-16)       | 3.04                      | 0.16         | 2.46        | 0.33        |
| MRI/CT for headache                                          | 575                     | 7 (4-10)            | 631                 | 9 (6-12)         | 244                     | 8 (4-12)         | 263                    | 9 (5-14)         | 0.33                      | 0.92         | -1.80       | 0.43        |
| Respondent experience: global rating of health care          | 23442                   | 69 (68-70)          | 19259               | 73 (72-74)       | 11386                   | 79 (78-81)       | 10293                  | 81 (80-82)       | <b>2.77</b>               | <b>0.007</b> | <b>2.12</b> | <b>0.03</b> |
| Respondent experience: doctor communication composite        | 23802                   | 57 (57-58)          | 19572               | 63 (62-64)       | 11463                   | 64 (63-65)       | 10362                  | 67 (65-68)       | <b>2.59</b>               | <b>0.005</b> | <b>1.86</b> | <b>0.04</b> |
| Doctor listened to you                                       | 23482                   | 59 (58-60)          | 19273               | 63 (62-64)       | 11406                   | 65 (64-67)       | 10295                  | 67 (66-68)       | <b>2.63</b>               | <b>0.01</b>  | 2.03        | 0.05        |
| Doctor explained so you understood                           | 23694                   | 59 (58-60)          | 19498               | 65 (64-66)       | 11447                   | 66 (65-68)       | 10353                  | 69 (67-70)       | <b>3.07</b>               | <b>0.003</b> | <b>2.32</b> | <b>0.02</b> |
| Doctor showed respect                                        | 23657                   | 63 (61-64)          | 19470               | 68 (66-69)       | 11436                   | 69 (68-70)       | 10335                  | 72 (71-73)       | 2.01                      | 0.05         | 1.32        | 0.20        |
| Doctor spent enough time with you                            | 23633                   | 49 (48-50)          | 19416               | 55 (54-56)       | 11430                   | 55 (54-57)       | 10334                  | 58 (57-60)       | <b>2.67</b>               | <b>0.02</b>  | 1.79        | 0.13        |

|                                                          | <400% FPL               |                     |                     |                  | ≥400% FPL               |                  |                        |                  | Difference in differences |                  |             |              |
|----------------------------------------------------------|-------------------------|---------------------|---------------------|------------------|-------------------------|------------------|------------------------|------------------|---------------------------|------------------|-------------|--------------|
|                                                          | Before ACA<br>(n=45811) |                     | After ACA (n=41900) |                  | Before ACA<br>(n=17693) |                  | After ACA<br>(n=17767) |                  |                           |                  |             |              |
| Measure or Composite                                     | n                       | Mean<br>(95%<br>CI) | n                   | Mean (95%<br>CI) | n                       | Mean (95%<br>CI) | n                      | Mean<br>(95% CI) | Unadjusted                | p                | Adjusted    | p            |
| Respondent experience: access to care composite          | 23414                   | 50 (49-51)          | 19222               | 54 (53-55)       | 11083                   | 59 (58-61)       | 10065                  | 60 (59-62)       | <b>3.20</b>               | <b>0.01</b>      | <b>2.58</b> | <b>0.047</b> |
| Got care when ill or injured as soon as wanted           | 11189                   | 53 (52-55)          | 8495                | 57 (55-59)       | 3744                    | 68 (66-70)       | 3295                   | 71 (69-73)       | 0.77                      | 0.68             | -0.31       | 0.87         |
| Got medical appointment as soon as wanted                | 20448                   | 49 (48-51)          | 16994               | 53 (52-54)       | 10398                   | 57 (56-59)       | 9466                   | 58 (56-60)       | <b>3.36</b>               | <b>0.02</b>      | <b>2.83</b> | <b>0.048</b> |
| <b>Utilization</b>                                       |                         |                     |                     |                  |                         |                  |                        |                  |                           |                  |             |              |
| Encounters, mean # per year (95% CI)                     |                         |                     |                     |                  |                         |                  |                        |                  |                           |                  |             |              |
| Office visits                                            | 45811                   | 4.3 (4.2-4.5)       | 41900               | 4.7 (4.5-4.9)    | 17693                   | 5.5 (5.3-5.8)    | 17767                  | 5.8 (5.5-6.1)    | 0.10                      | 0.57             | 0.12        | 0.50         |
| Emergency department visits                              | 45811                   | 0.2 (0.2-0.2)       | 41900               | 0.2 (0.2-0.2)    | 17693                   | 0.1 (0.1-0.1)    | 17767                  | 0.1 (0.1-0.1)    | -0.01                     | 0.27             | 0.00        | 0.97         |
| Hospital admissions                                      | 45811                   | 0.1 (0.1-0.1)       | 41900               | 0.1 (0.1-0.1)    | 17693                   | 0.1 (0.1-0.1)    | 17767                  | 0.1 (0-0.1)      | 0.00                      | 0.84             | 0.01        | 0.26         |
| Prescribed medicines, mean total fills per year (95% CI) | 45811                   | 10.2 (9.8-10.7)     | 41900               | 10.5 (10-11)     | 17693                   | 9.0 (8.5-9.4)    | 17767                  | 8.6 (8.2-9)      | 0.67                      | 0.09             | 0.34        | 0.29         |
| Preventive visit within past year                        | 43741                   | 58 (57-59)          | 40117               | 60 (59-61)       | 16935                   | 69 (68-70)       | 17158                  | 69 (68-71)       | 1.81                      | 0.07             | 0.70        | 0.48         |
| Has primary care                                         | 42923                   | 65 (64-66)          | 39182               | 66 (65-67)       | 16527                   | 80 (78-81)       | 16518                  | 77 (76-78)       | <b>3.33</b>               | <b>&lt;0.001</b> | <b>2.97</b> | <b>0.001</b> |

| Measure or Composite           | <400% FPL            |                  |                     |                  | ≥400% FPL            |                  |                     |                  | Difference in differences |              |                |              |
|--------------------------------|----------------------|------------------|---------------------|------------------|----------------------|------------------|---------------------|------------------|---------------------------|--------------|----------------|--------------|
|                                | Before ACA (n=45811) |                  | After ACA (n=41900) |                  | Before ACA (n=17693) |                  | After ACA (n=17767) |                  | Unadjusted                | p            | Adjusted       | p            |
| n                              | Mean (95% CI)        | n                | Mean (95% CI)       | n                | Mean (95% CI)        | n                | Mean (95% CI)       |                  |                           |              |                |              |
| Cost                           |                      |                  |                     |                  |                      |                  |                     |                  |                           |              |                |              |
| Total <sup>c</sup>             | 45811                | 3871 (3678-4063) | 41900               | 4309 (4010-4607) | 17693                | 4401 (4120-4683) | 17767               | 4591 (4315-4867) | 248.53                    | 0.25         | 195.67         | 0.37         |
| Office-based <sup>c</sup>      | 45811                | 867 (824-911)    | 41900               | 954 (900-1009)   | 17693                | 1206 (1146-1265) | 17767               | 1327 (1248-1406) | -34.36                    | 0.52         | 0.28           | 1.00         |
| HOD-based <sup>c</sup>         | 45811                | 327 (296-357)    | 41900               | 411 (345-477)    | 17693                | 531 (452-610)    | 17767               | 566 (481-652)    | 49.26                     | 0.43         | 81.31          | 0.20         |
| Inpatient-based <sup>c</sup>   | 45811                | 1170 (1069-1270) | 41900               | 1160 (1012-1307) | 17693                | 1061 (876-1246)  | 17767               | 933 (769-1097)   | 118.40                    | 0.40         | 193.15         | 0.21         |
| Prescriptions <sup>c</sup>     | 45811                | 944 (830-1057)   | 41900               | 1126 (1016-1237) | 17693                | 957 (863-1052)   | 17767               | 1045 (930-1161)  | 94.38                     | 0.32         | -41.86         | 0.70         |
| Out of pocket, total           | 45811                | 504 (477-530)    | 41900               | 439 (416-461)    | 17693                | 757 (719-794)    | 17767               | 769 (734-804)    | <b>-77.26</b>             | <b>0.008</b> | <b>-105.50</b> | <b>0.001</b> |
| Out of pocket, office-based    | 45811                | 126 (118-134)    | 41900               | 131 (119-142)    | 17693                | 239 (220-257)    | 17767               | 278 (260-296)    | <b>-35.05</b>             | <b>0.006</b> | <b>-45.39</b>  | <b>0.002</b> |
| Out of pocket, HOD-based       | 45811                | 29 (24-35)       | 41900               | 23 (20-26)       | 17693                | 46 (38-54)       | 17767               | 52 (45-59)       | <b>-12.20</b>             | <b>0.04</b>  | <b>-14.59</b>  | <b>0.03</b>  |
| Out of pocket, inpatient-based | 45811                | 49 (36-61)       | 41900               | 28 (23-33)       | 17693                | 50 (33-67)       | 17767               | 38 (31-45)       | -8.79                     | 0.44         | -0.75          | 0.95         |
| Out of pocket, prescriptions   | 45811                | 156 (145-167)    | 41900               | 127 (116-138)    | 17693                | 200 (187-213)    | 17767               | 159 (147-171)    | 12.17                     | 0.23         | 3.14           | 0.76         |

<sup>a</sup> Includes out-of-pocket expenditures

\* Sample size limited such that only one cluster in a stratum for given measure; variance and 95% CI cannot be calculated

**Note:** bold signifies p < 0.05.

**Note:** regression adjusted for each year, age, gender, race/ethnicity, census region, partner status, education status, health status, employed status, smoking status, ADLs, iADLs, SF-12 PCS, SF-12 MCS, BMI, Kessler, hypertension, dyslipidemia, diabetes, chronic obstructive pulmonary disease, coronary artery disease or myocardial infarction, cancer, asthma, arthritis, frequency of chronic disease, and primary care. Adjustment did not include primary care for the “Has primary care” outcome.

**eFigure 1:** High-Value Care Composites, 2011-2016

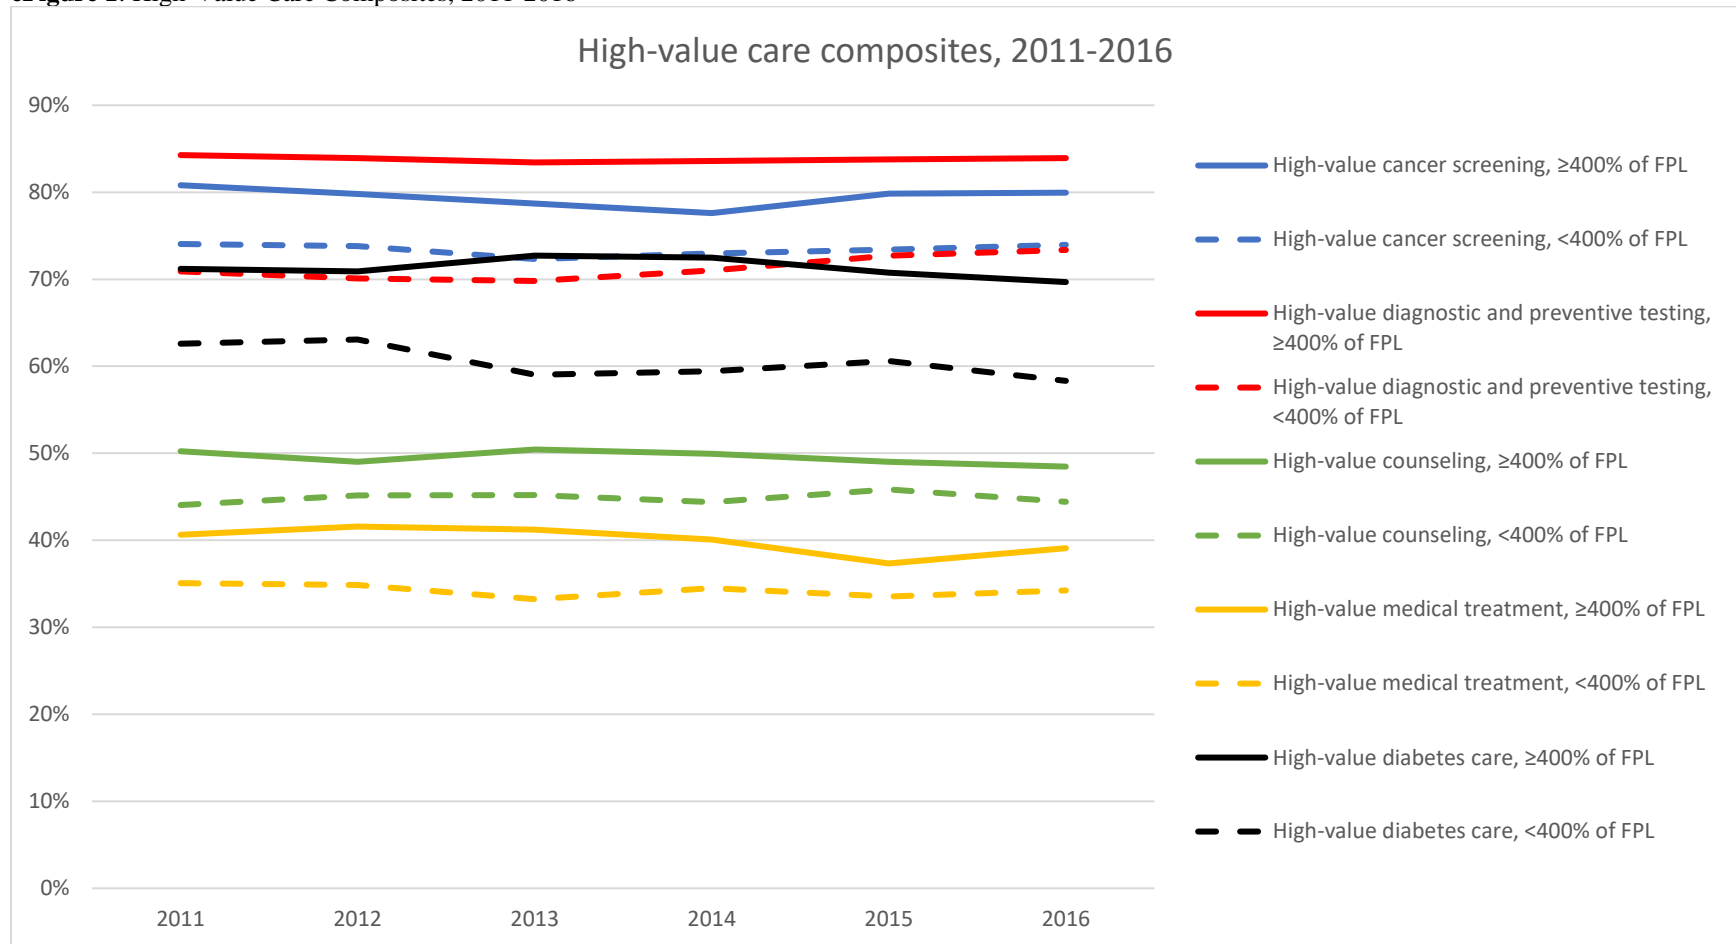

**eFigure 2:** Low-Value Care Composites, 2011-2016

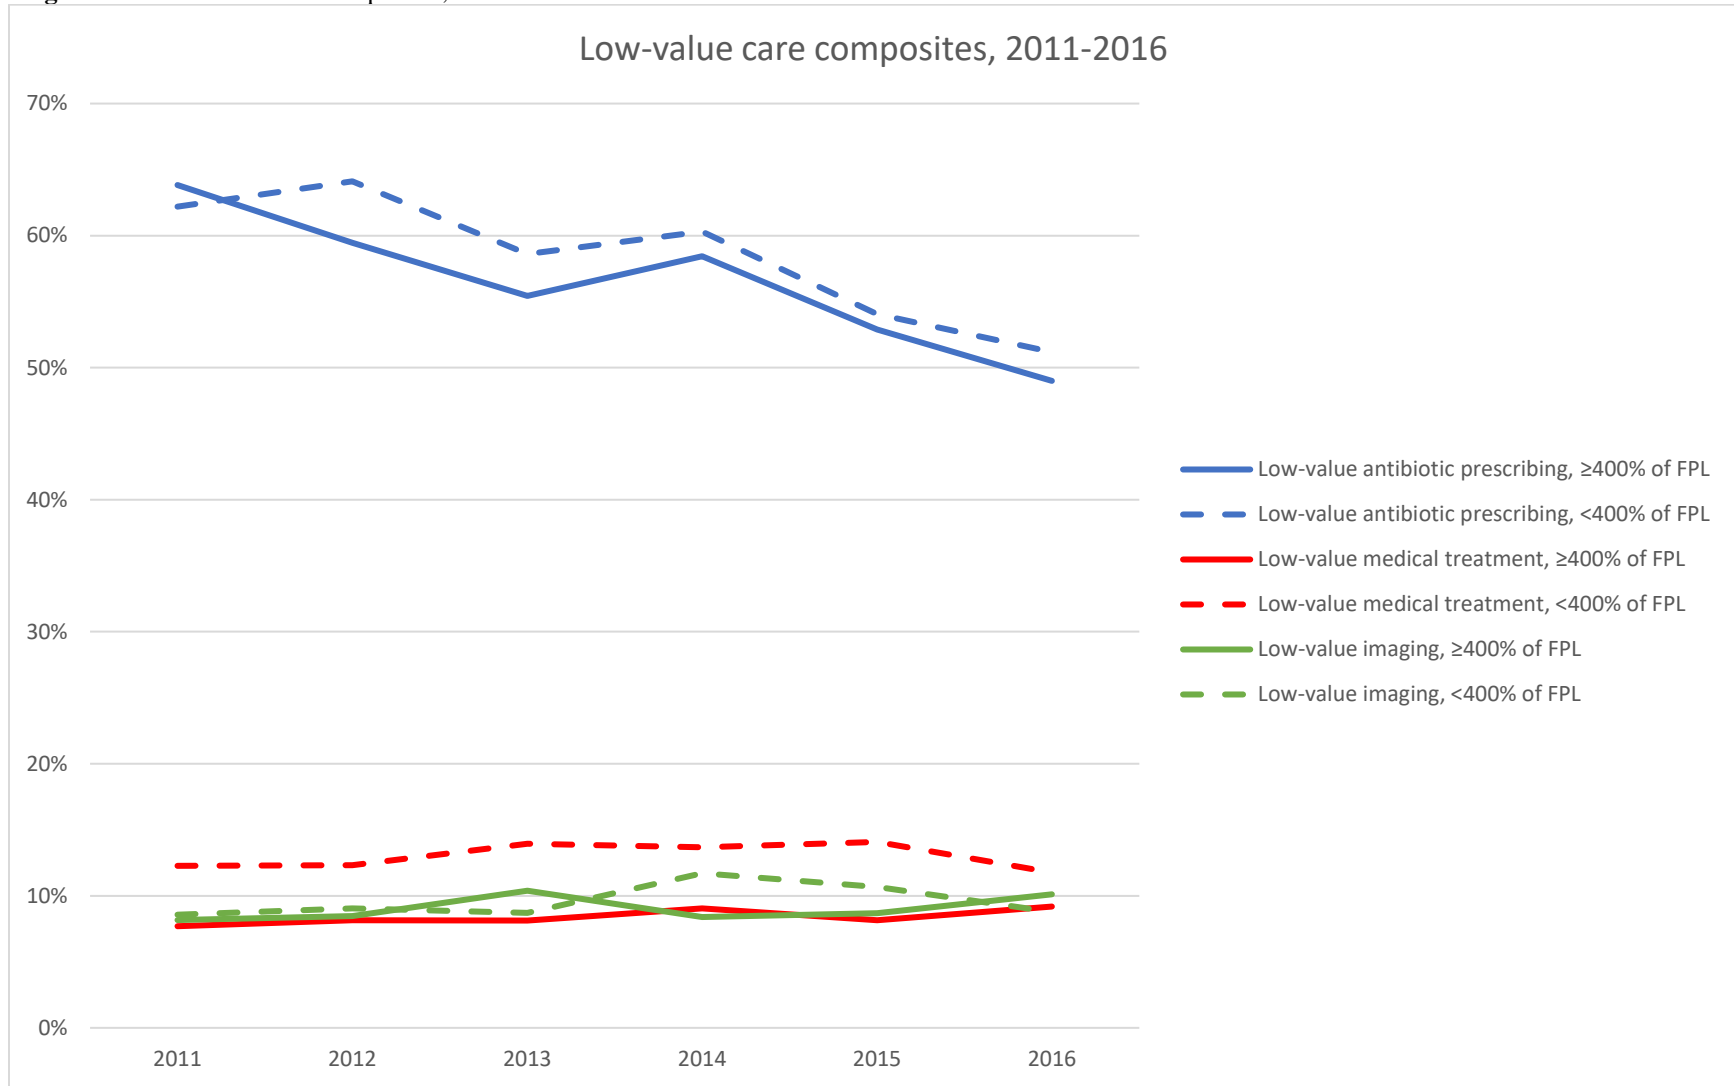

**eFigure 3:** Experience Composites, 2011-2016

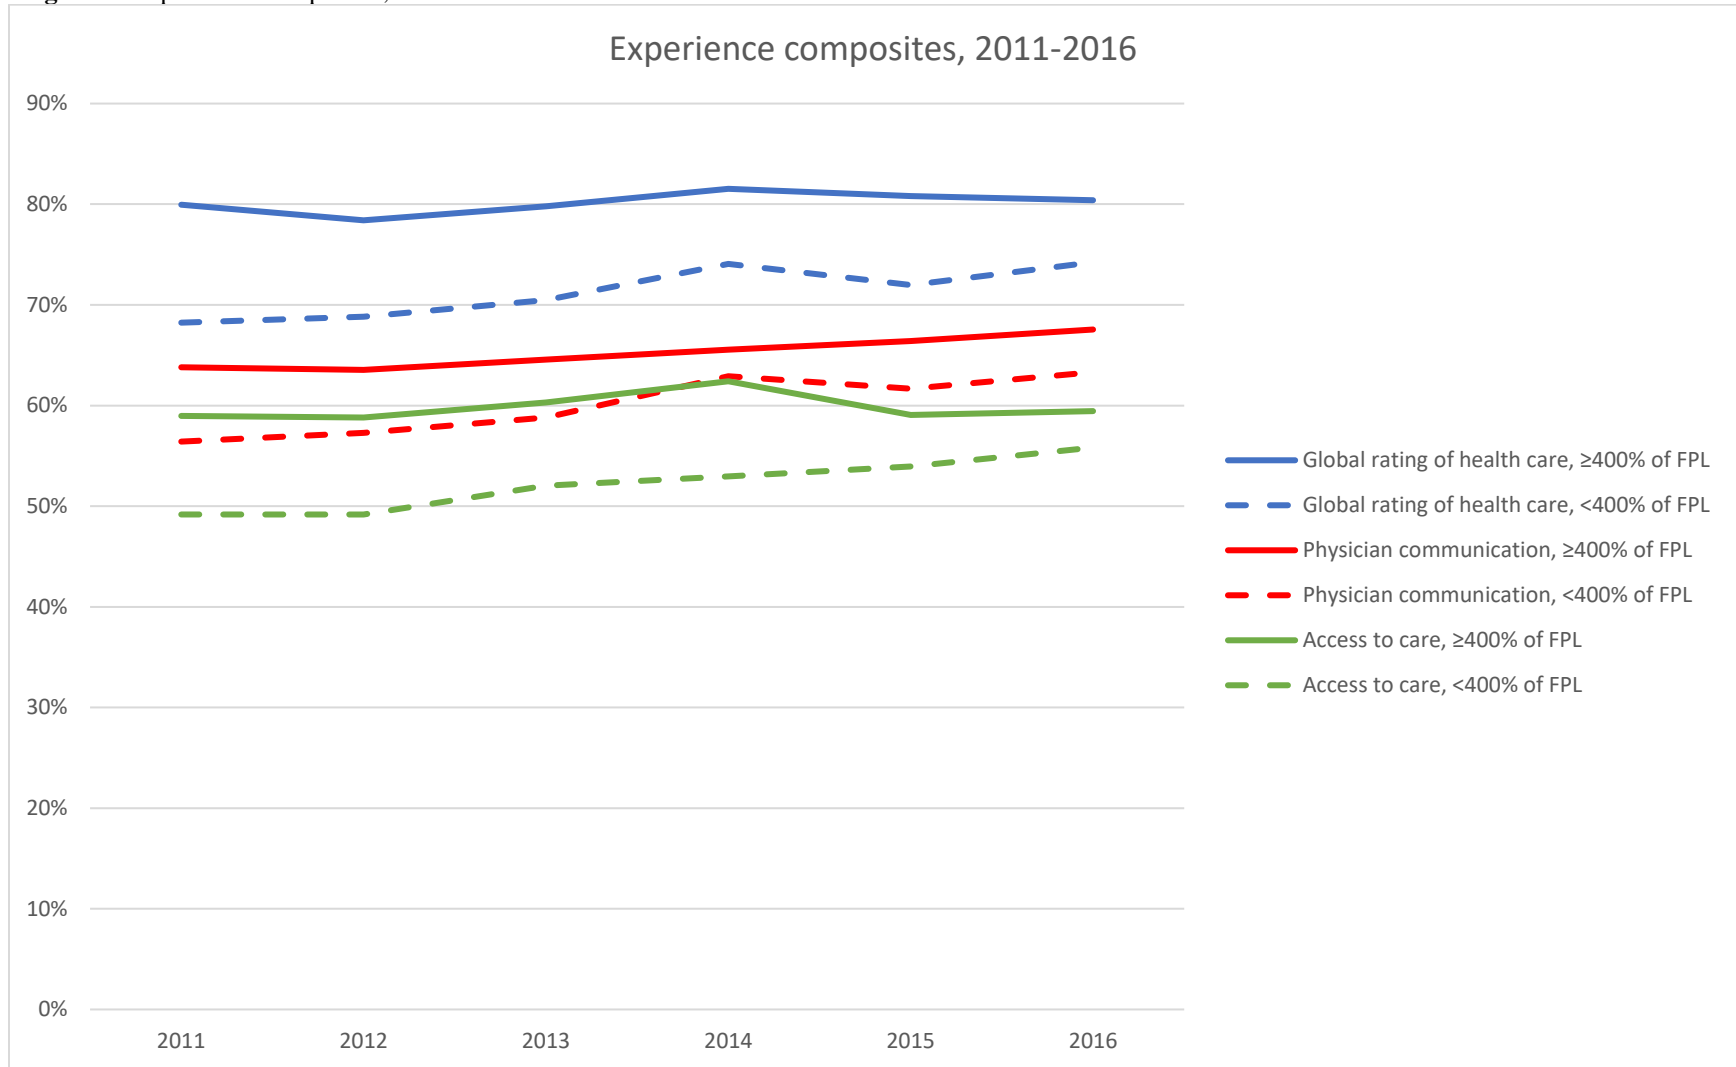



eFigure 4: Utilization, 2011-2016

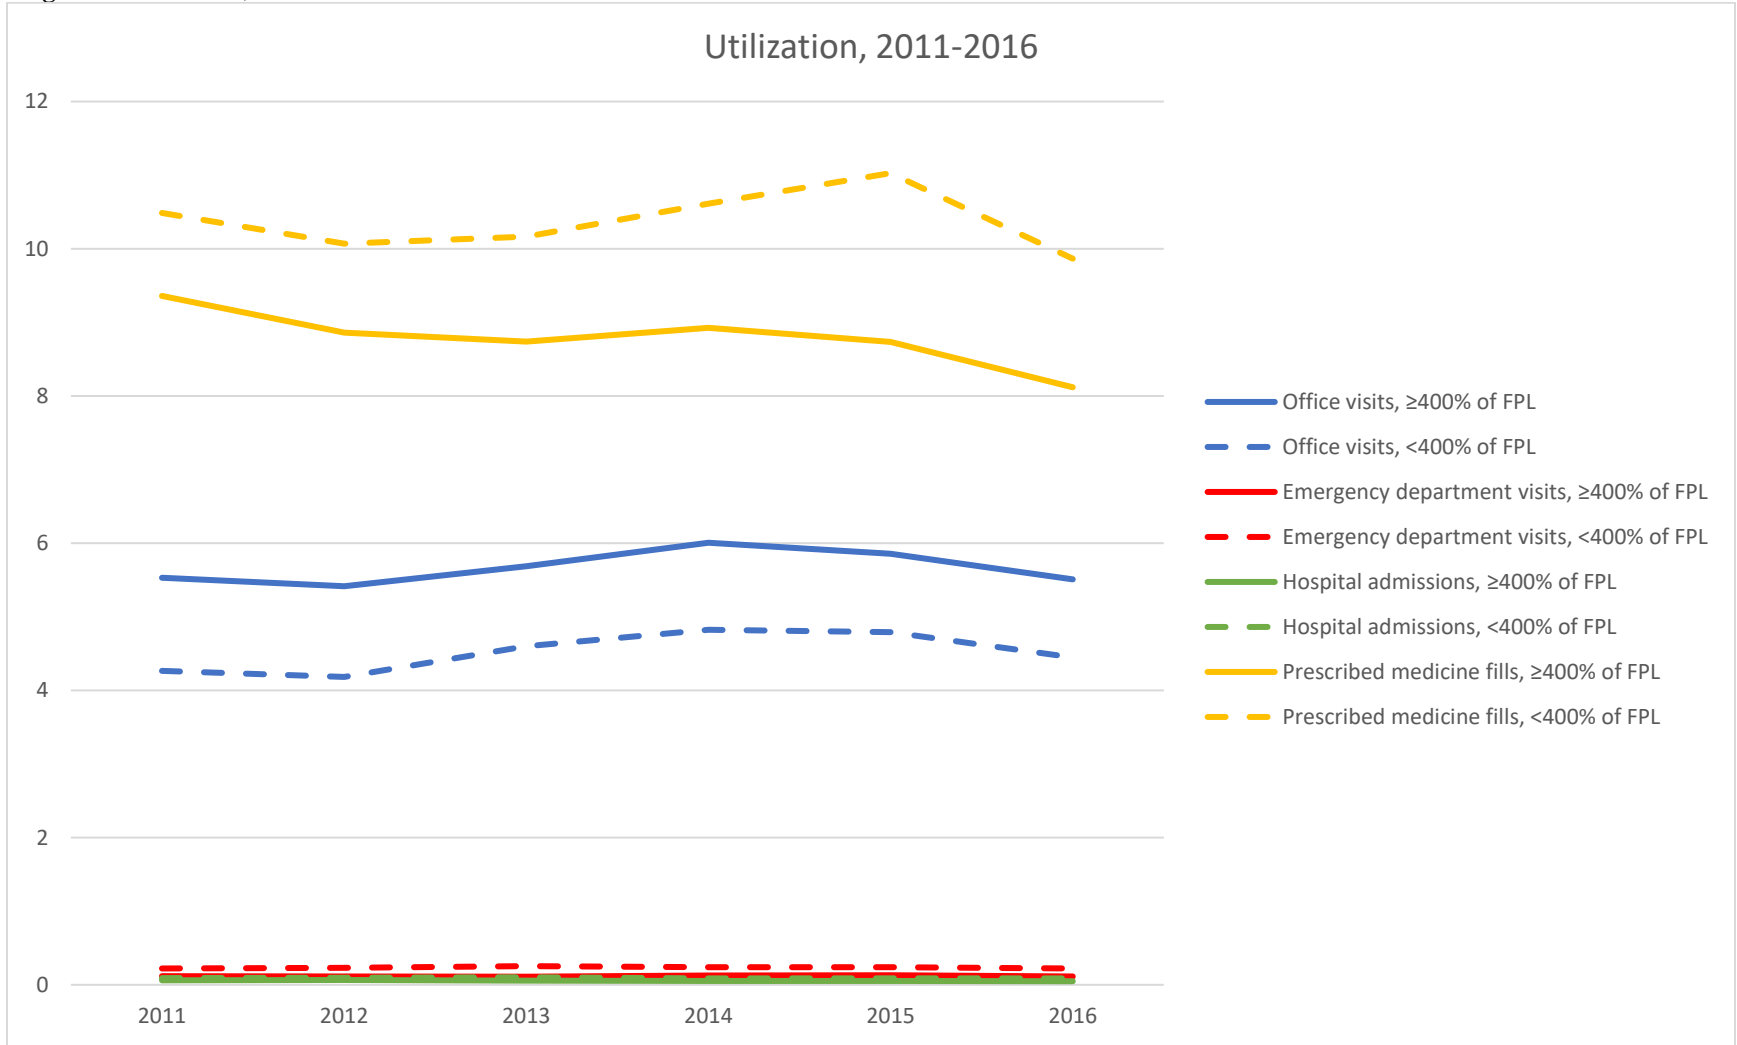

**eFigure 5:** Utilization—Preventive Visit and Primary Care, 2011-2016

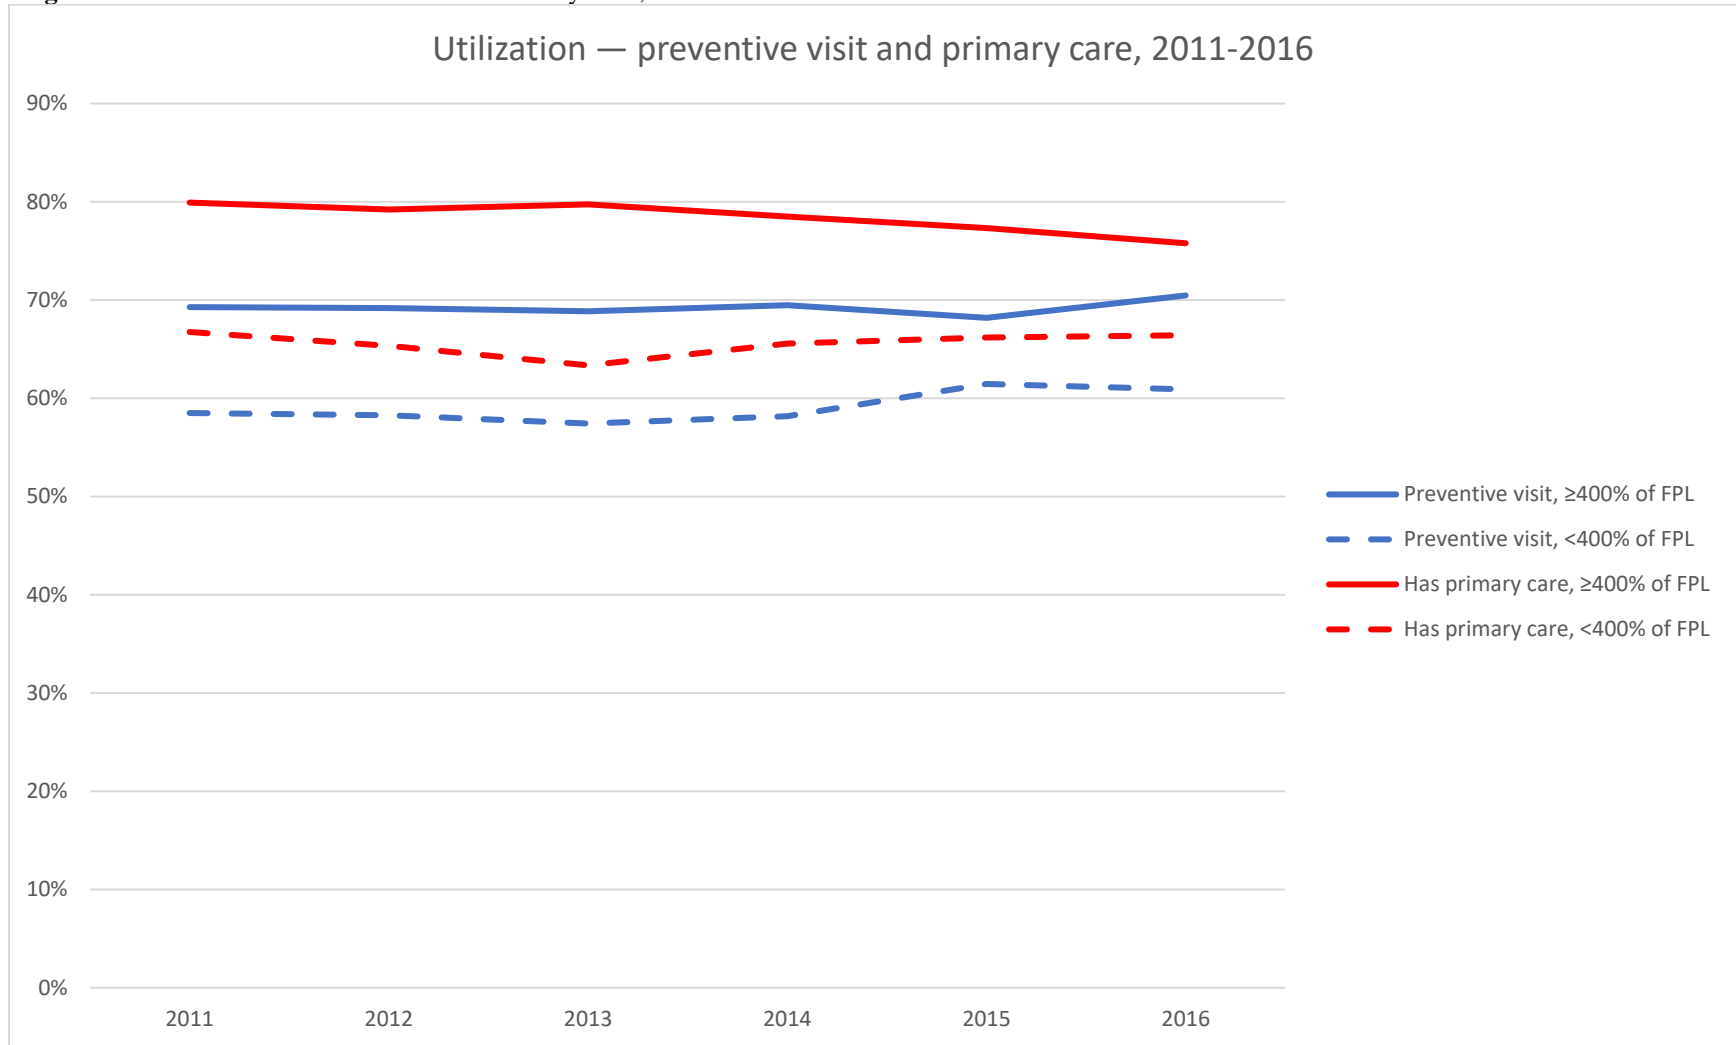

**eFigure 6:** Total Costs, 2011-2016

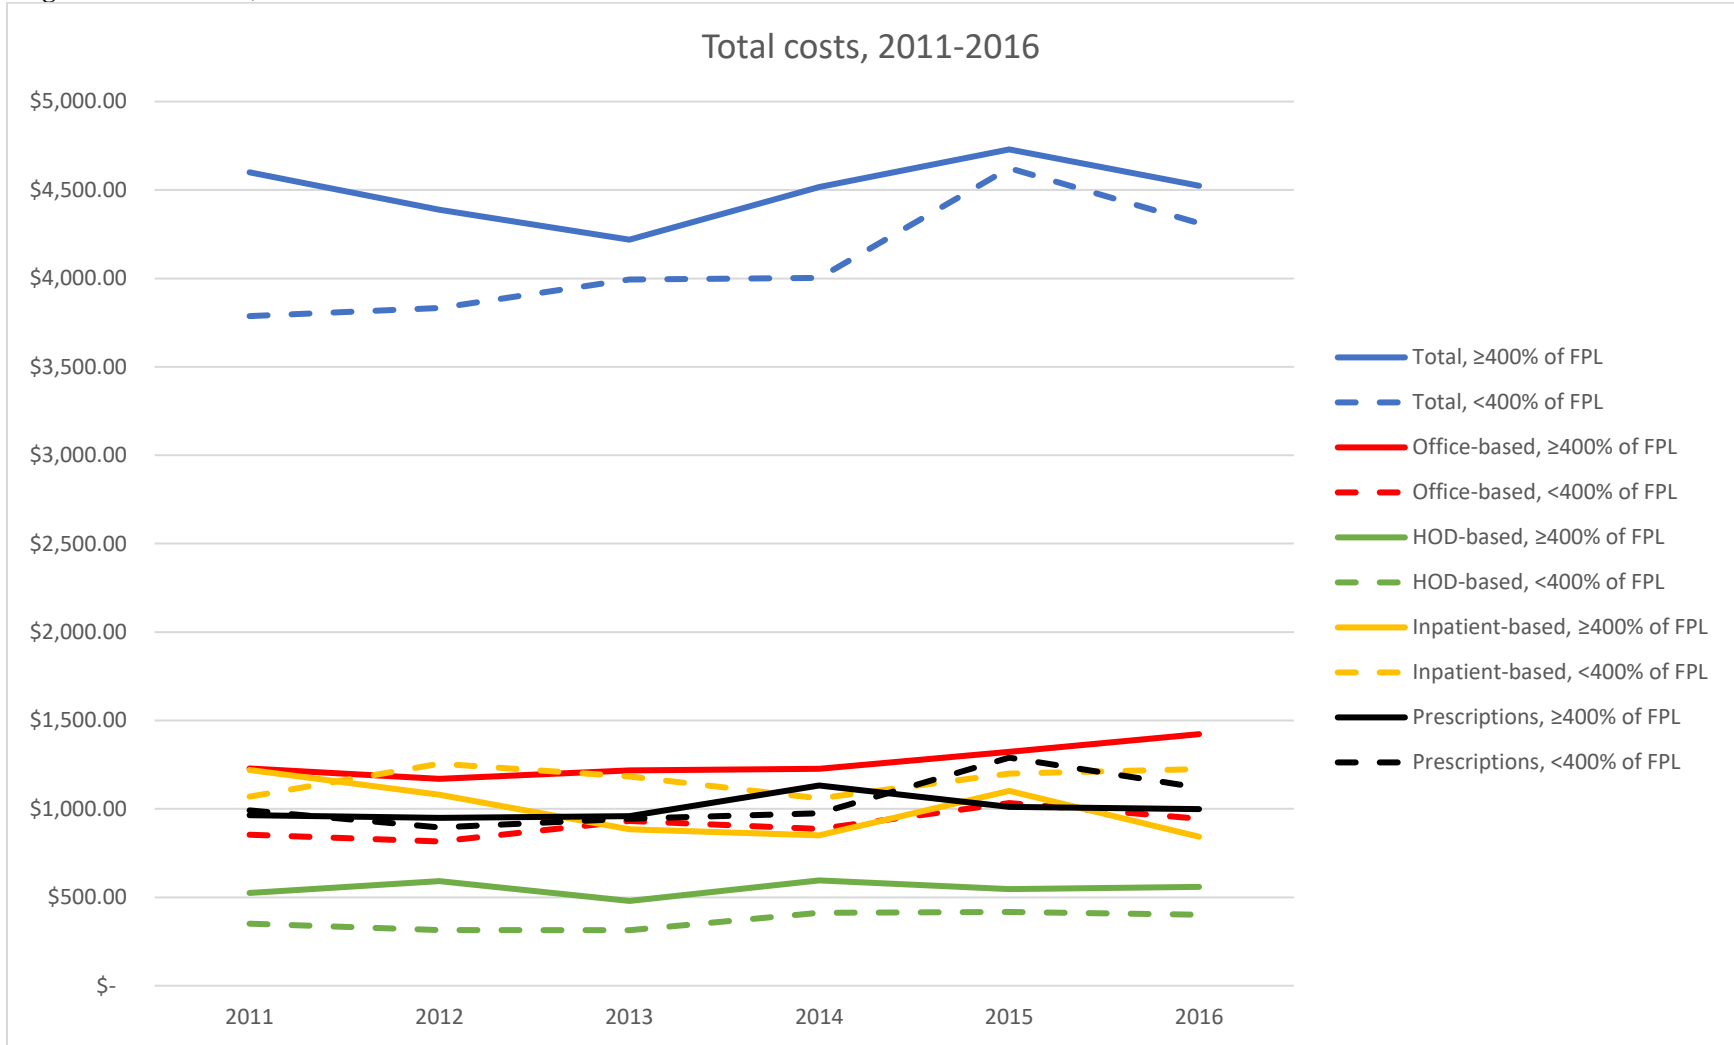

**eFigure 7:** Out-of-Pocket Costs, 2011-2016

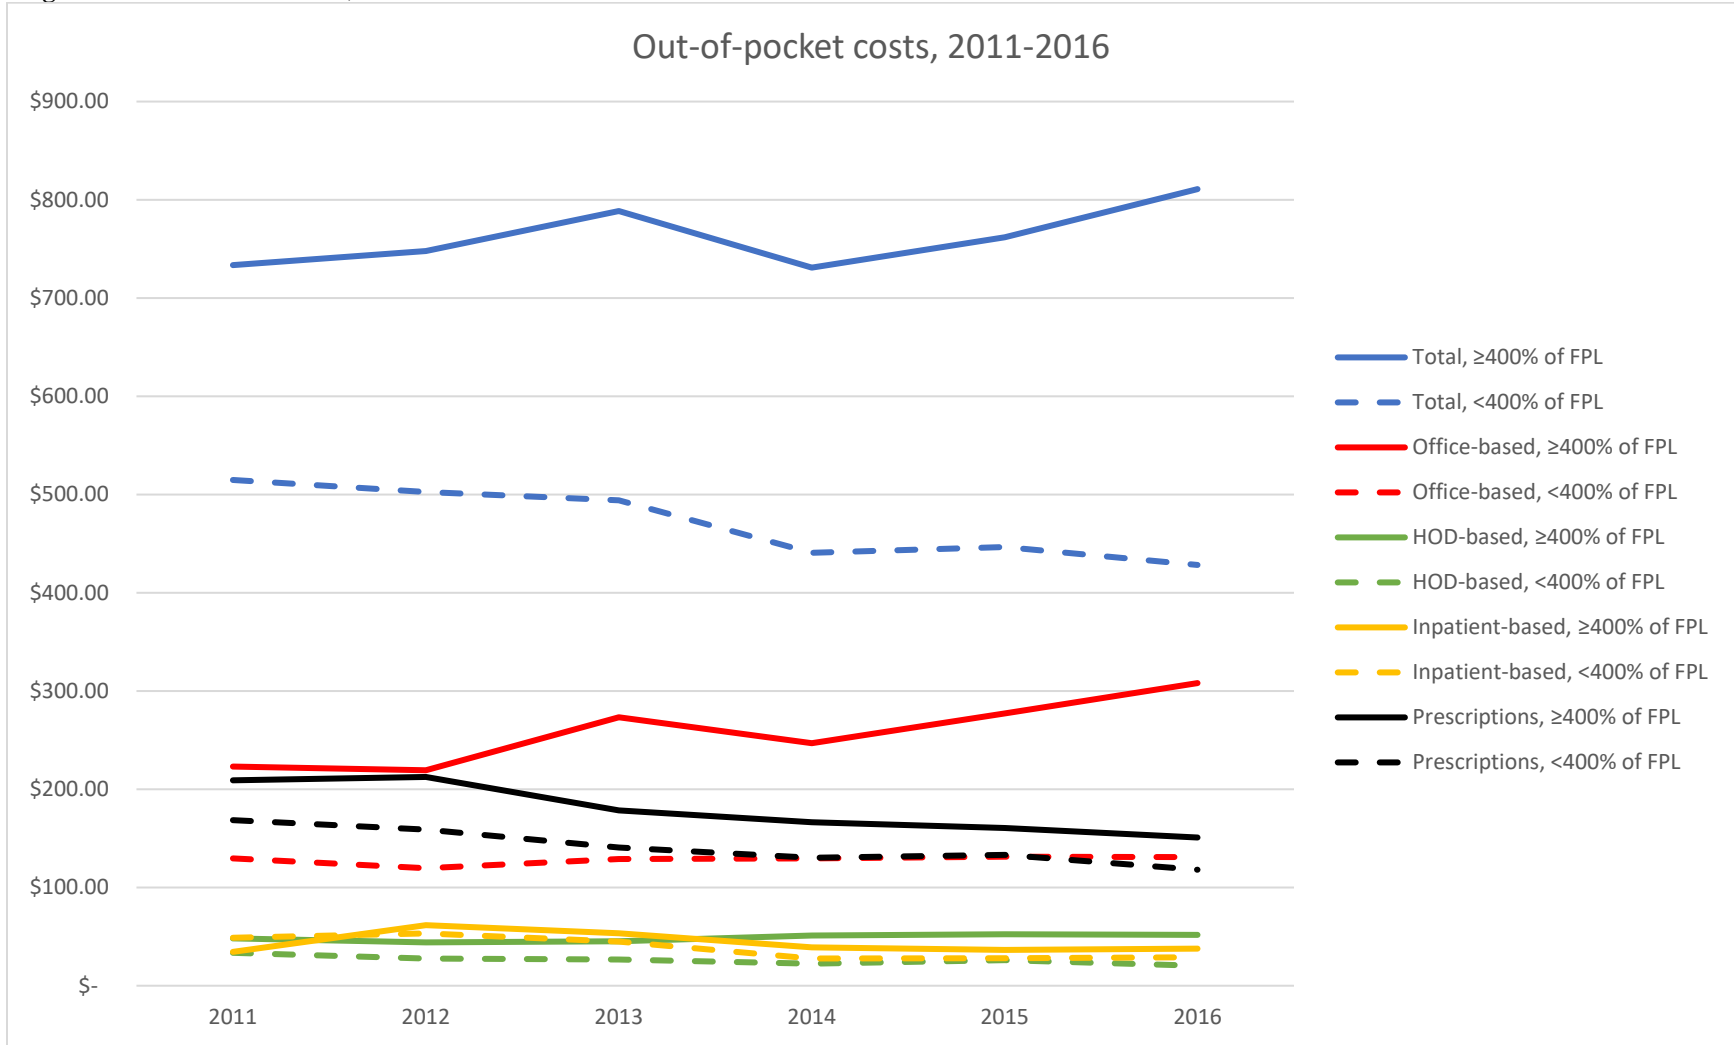

Supplement: jamanetwopen-e2218167-s001.pdf [file jamanetwopen-e2218167-s001.pdf]
